# Supplementary material for: The effect of chloroquine dose and primaquine on Plasmodium vivax recurrence: a WorldWide Antimalarial Resistance Network systematic review and individual patient pooled meta-analysis
Source: PubMed Central journal article supplement (PMC6105624; doi:10.1016/s1473-3099(18)30348-7), 2018-09
Supplement: mmc1.pdf [file mmc1.pdf]

# THE LANCET Infectious Diseases

## Supplementary webappendix

This webappendix formed part of the original submission and has been peer reviewed. We post it as supplied by the authors.

Supplement to: Commons RJ, Simpson JA, Thriemer K, et al. The effect of chloroquine dose and primaquine on Plasmodium vivax recurrence: a WorldWide Antimalarial Resistance Network systematic review and individual patient pooled meta-analysis. *Lancet Infect Dis* 2018; published online July 19. [http://dx.doi.org/10.1016/S1473-3099\(18\)30348-7](http://dx.doi.org/10.1016/S1473-3099(18)30348-7).

# APPENDIX

Commons, R.J., et al: **The effect of chloroquine dose and primaquine on *Plasmodium vivax* recurrence: a WorldWide Antimalarial Resistance Network systematic review and individual patient pooled meta-analysis**

|                                                                                                                                                                                                                                      | Page |
|--------------------------------------------------------------------------------------------------------------------------------------------------------------------------------------------------------------------------------------|------|
| <b>PRISMA-IPD Checklist</b>                                                                                                                                                                                                          | 2    |
| <b>Box 1. Search Strategy</b>                                                                                                                                                                                                        | 6    |
| <b>Study sites for clinical trials:</b>                                                                                                                                                                                              |      |
| - <b>Figure S1. Asia-Pacific Region</b>                                                                                                                                                                                              | 7    |
| - <b>Figure S2. Africa and Europe</b>                                                                                                                                                                                                | 8    |
| - <b>Figure S3. The Americas</b>                                                                                                                                                                                                     | 9    |
| <b>Figure S4. Histogram of drug dosing</b>                                                                                                                                                                                           | 10   |
| <b>Figure S5. Mg/kg drug dosing of chloroquine by bodyweight in patients receiving chloroquine alone</b>                                                                                                                             | 11   |
| <b>Figure S6. Risk of recurrence by study at day 28 and 42 in patients receiving chloroquine alone</b>                                                                                                                               | 12   |
| <b>Table S1. Reasons for studies not being included in analysis</b>                                                                                                                                                                  | 13   |
| <b>Table S2. Studies included in the analysis</b>                                                                                                                                                                                    | 14   |
| <b>Table S3. Study sites included in the analysis</b>                                                                                                                                                                                | 16   |
| <b>Table S4. Studies targeted for the analysis but not included</b>                                                                                                                                                                  | 18   |
| <b>Table S5. Comparison of baseline characteristics between included and targeted studies</b>                                                                                                                                        | 21   |
| <b>Total drug dosing by baseline characteristic:</b>                                                                                                                                                                                 |      |
| - <b>Table S6A. Patients receiving chloroquine alone</b>                                                                                                                                                                             | 22   |
| - <b>Table S6B. Patients receiving chloroquine and early primaquine</b>                                                                                                                                                              | 23   |
| <b>Table S7. Risk factors for vomiting in patients treated with chloroquine alone</b>                                                                                                                                                | 24   |
| <b>Table S8. Multivariable models for rate of <i>P. vivax</i> recurrence between day 7 and 42 in patients receiving chloroquine alone aged less than five years, five to less than 15 years or greater than or equal to 15 years</b> | 25   |
| <b>Table S9. Risk factors for patent parasitaemia on day 1 in patients receiving chloroquine alone</b>                                                                                                                               | 26   |
| <b>Table S10. Multivariable model evaluating the relationship between day of parasite clearance and rate of <i>P. vivax</i> recurrence between day 7 and 28 in patients receiving chloroquine alone</b>                              | 27   |
| <b>Table S11. Planned primaquine regimens in patients receiving chloroquine and early primaquine</b>                                                                                                                                 | 28   |
| <b>Table S12. Multivariable model for rate of <i>P. vivax</i> recurrence between day 7 and 42 in patients receiving chloroquine alone or chloroquine and early primaquine</b>                                                        | 29   |
| <b>Table S13. Rate of <i>P. vivax</i> recurrence between day 7 and 42 in the subgroup of patients receiving chloroquine and early primaquine</b>                                                                                     | 30   |
| <b>Table S14. Multivariable model for rate of <i>P. vivax</i> recurrence between day 7 and 42 in patients aged less than five years receiving chloroquine alone in long relapse periodicity regions</b>                              | 31   |
| <b>Table S15. Accuracy of presence of parasite positivity in determining risk of recurrence prior to day 28 in patients receiving chloroquine alone</b>                                                                              | 32   |
| <b>Sensitivity analyses for the of rate of <i>P. vivax</i> recurrence between day 7 and 42:</b>                                                                                                                                      |      |
| - <b>Table S16. Overall model of patients that received chloroquine alone</b>                                                                                                                                                        | 33   |
| - <b>Table S17. Patients receiving chloroquine alone aged less than 5 years</b>                                                                                                                                                      | 34   |
| - <b>Table S18. Patients receiving chloroquine alone aged five to less than 15 years</b>                                                                                                                                             | 35   |
| - <b>Table S19. Patients receiving chloroquine alone aged 15 years or more</b>                                                                                                                                                       | 36   |
| - <b>Table S20. Patients receiving chloroquine alone or chloroquine and early primaquine</b>                                                                                                                                         | 37   |
| <b>References of all studies not included in analysis</b>                                                                                                                                                                            | 38   |

PRISMA-IPD Checklist of items to include when reporting a systematic review and meta-analysis of individual participant data (IPD)

| PRISMA-IPD Section/topic                  | Item No | Checklist item                                                                                                                                                                                                                                                                                                                                                                                                                                                                                                          | Reported on page |   |
|-------------------------------------------|---------|-------------------------------------------------------------------------------------------------------------------------------------------------------------------------------------------------------------------------------------------------------------------------------------------------------------------------------------------------------------------------------------------------------------------------------------------------------------------------------------------------------------------------|------------------|---|
| <b>Title</b>                              |         |                                                                                                                                                                                                                                                                                                                                                                                                                                                                                                                         |                  |   |
| Title                                     | 1       | Identify the report as a systematic review and meta-analysis of individual participant data.                                                                                                                                                                                                                                                                                                                                                                                                                            | 1                |   |
| <b>Abstract</b>                           |         |                                                                                                                                                                                                                                                                                                                                                                                                                                                                                                                         |                  |   |
| Structured summary                        | 2       | Provide a structured summary including as applicable:                                                                                                                                                                                                                                                                                                                                                                                                                                                                   |                  |   |
|                                           |         | <b>Background:</b> state research question and main objectives, with information on participants, interventions, comparators and outcomes.                                                                                                                                                                                                                                                                                                                                                                              |                  | 4 |
|                                           |         | <b>Methods:</b> report eligibility criteria; data sources including dates of last bibliographic search or elicitation, noting that IPD were sought; methods of assessing risk of bias.                                                                                                                                                                                                                                                                                                                                  |                  | 4 |
|                                           |         | <b>Results:</b> provide number and type of studies and participants identified and number (%) obtained; summary effect estimates for main outcomes (benefits and harms) with confidence intervals and measures of statistical heterogeneity. Describe the direction and size of summary effects in terms meaningful to those who would put findings into practice.                                                                                                                                                      |                  | 4 |
|                                           |         | <b>Discussion:</b> state main strengths and limitations of the evidence, general interpretation of the results and any important implications.                                                                                                                                                                                                                                                                                                                                                                          |                  | 4 |
|                                           |         | <b>Other:</b> report primary funding source, registration number and registry name for the systematic review and IPD meta-analysis.                                                                                                                                                                                                                                                                                                                                                                                     | 4                |   |
| <b>Introduction</b>                       |         |                                                                                                                                                                                                                                                                                                                                                                                                                                                                                                                         |                  |   |
| Rationale                                 | 3       | Describe the rationale for the review in the context of what is already known.                                                                                                                                                                                                                                                                                                                                                                                                                                          | 6                |   |
| Objectives                                | 4       | Provide an explicit statement of the questions being addressed with reference, as applicable, to participants, interventions, comparisons, outcomes and study design (PICOS). Include any hypotheses that relate to particular types of participant-level subgroups.                                                                                                                                                                                                                                                    | 6                |   |
| <b>Methods</b>                            |         |                                                                                                                                                                                                                                                                                                                                                                                                                                                                                                                         |                  |   |
| Protocol and registration                 | 5       | Indicate if a protocol exists and where it can be accessed. If available, provide registration information including registration number and registry name. Provide publication details, if applicable.                                                                                                                                                                                                                                                                                                                 | 7 & 8            |   |
| Eligibility criteria                      | 6       | Specify inclusion and exclusion criteria including those relating to participants, interventions, comparisons, outcomes, study design and characteristics (e.g. years when conducted, required minimum follow-up). Note whether these were applied at the study or individual level i.e. whether eligible participants were included (and ineligible participants excluded) from a study that included a wider population than specified by the review inclusion criteria. The rationale for criteria should be stated. | 7                |   |
| Identifying studies - information sources | 7       | Describe all methods of identifying published and unpublished studies including, as applicable: which bibliographic databases were searched with dates of coverage; details of any hand searching including of conference proceedings; use of study registers and agency or company databases; contact with the original research team and experts in the field; open adverts and surveys. Give the date of last search or elicitation.                                                                                 | 7                |   |
| Identifying studies - search              | 8       | Present the full electronic search strategy for at least one database, including any limits used, such that it could be repeated.                                                                                                                                                                                                                                                                                                                                                                                       | Appendix         |   |

|                                                |    |                                                                                                                                                                                                                                                                                                                                                                                                                                                                                                                                                                                                                                                                                                                                                                                                                                                                                                                                                                                                                                   |                |
|------------------------------------------------|----|-----------------------------------------------------------------------------------------------------------------------------------------------------------------------------------------------------------------------------------------------------------------------------------------------------------------------------------------------------------------------------------------------------------------------------------------------------------------------------------------------------------------------------------------------------------------------------------------------------------------------------------------------------------------------------------------------------------------------------------------------------------------------------------------------------------------------------------------------------------------------------------------------------------------------------------------------------------------------------------------------------------------------------------|----------------|
| Study selection processes                      | 9  | State the process for determining which studies were eligible for inclusion.                                                                                                                                                                                                                                                                                                                                                                                                                                                                                                                                                                                                                                                                                                                                                                                                                                                                                                                                                      | 7 (and ref 14) |
| Data collection processes                      | 10 | Describe how IPD were requested, collected and managed, including any processes for querying and confirming data with investigators. If IPD were not sought from any eligible study, the reason for this should be stated (for each such study).                                                                                                                                                                                                                                                                                                                                                                                                                                                                                                                                                                                                                                                                                                                                                                                  | 7              |
|                                                |    | If applicable, describe how any studies for which IPD were not available were dealt with. This should include whether, how and what aggregate data were sought or extracted from study reports and publications (such as extracting data independently in duplicate) and any processes for obtaining and confirming these data with investigators.                                                                                                                                                                                                                                                                                                                                                                                                                                                                                                                                                                                                                                                                                | 7              |
| Data items                                     | 11 | Describe how the information and variables to be collected were chosen. List and define all study level and participant level data that were sought, including baseline and follow-up information. If applicable, describe methods of standardising or translating variables within the IPD datasets to ensure common scales or measurements across studies.                                                                                                                                                                                                                                                                                                                                                                                                                                                                                                                                                                                                                                                                      | 7 & 8          |
| IPD integrity                                  | A1 | Describe what aspects of IPD were subject to data checking (such as sequence generation, data consistency and completeness, baseline imbalance) and how this was done.                                                                                                                                                                                                                                                                                                                                                                                                                                                                                                                                                                                                                                                                                                                                                                                                                                                            | 7 (ref 15)     |
| Risk of bias assessment in individual studies. | 12 | Describe methods used to assess risk of bias in the individual studies and whether this was applied separately for each outcome. If applicable, describe how findings of IPD checking were used to inform the assessment. Report if and how risk of bias assessment was used in any data synthesis.                                                                                                                                                                                                                                                                                                                                                                                                                                                                                                                                                                                                                                                                                                                               | 8 & Appendix   |
| Specification of outcomes and effect measures  | 13 | State all treatment comparisons of interests. State all outcomes addressed and define them in detail. State whether they were pre-specified for the review and, if applicable, whether they were primary/main or secondary/additional outcomes. Give the principal measures of effect (such as risk ratio, hazard ratio, difference in means) used for each outcome.                                                                                                                                                                                                                                                                                                                                                                                                                                                                                                                                                                                                                                                              | 7 & 8          |
| Synthesis methods                              | 14 | Describe the meta-analysis methods used to synthesise IPD. Specify any statistical methods and models used. Issues should include (but are not restricted to): <ul style="list-style-type: none"> <li>• Use of a one-stage or two-stage approach.</li> <li>• How effect estimates were generated separately within each study and combined across studies (where applicable).</li> <li>• Specification of one-stage models (where applicable) including how clustering of patients within studies was accounted for.</li> <li>• Use of fixed or random effects models and any other model assumptions, such as proportional hazards.</li> <li>• How (summary) survival curves were generated (where applicable).</li> <li>• Methods for quantifying statistical heterogeneity (such as <math>I^2</math> and <math>\tau^2</math>).</li> <li>• How studies providing IPD and not providing IPD were analysed together (where applicable).</li> <li>• How missing data within the IPD were dealt with (where applicable).</li> </ul> | 8              |
| Exploration of variation in effects            | A2 | If applicable, describe any methods used to explore variation in effects by study or participant level characteristics (such as estimation of interactions between effect and covariates). State all participant-level characteristics that were analysed as potential effect modifiers, and whether these were pre-specified.                                                                                                                                                                                                                                                                                                                                                                                                                                                                                                                                                                                                                                                                                                    | 9              |
| Risk of bias across studies                    | 15 | Specify any assessment of risk of bias relating to the accumulated body of evidence, including any pertaining to not obtaining IPD for particular studies, outcomes or other variables.                                                                                                                                                                                                                                                                                                                                                                                                                                                                                                                                                                                                                                                                                                                                                                                                                                           | 9 & Appendix   |

|                                  |    |                                                                                                                                                                                                                                                                                                                                                                                                                                                                   |               |
|----------------------------------|----|-------------------------------------------------------------------------------------------------------------------------------------------------------------------------------------------------------------------------------------------------------------------------------------------------------------------------------------------------------------------------------------------------------------------------------------------------------------------|---------------|
| Additional analyses              | 16 | Describe methods of any additional analyses, including sensitivity analyses. State which of these were pre-specified.                                                                                                                                                                                                                                                                                                                                             | 9             |
| <b>Results</b>                   |    |                                                                                                                                                                                                                                                                                                                                                                                                                                                                   |               |
| Study selection and IPD obtained | 17 | Give numbers of studies screened, assessed for eligibility, and included in the systematic review with reasons for exclusions at each stage. Indicate the number of studies and participants for which IPD were sought and for which IPD were obtained. For those studies where IPD were not available, give the numbers of studies and participants for which aggregate data were available. Report reasons for non-availability of IPD. Include a flow diagram. | 10 & Appendix |
| Study characteristics            | 18 | For each study, present information on key study and participant characteristics (such as description of interventions, numbers of participants, demographic data, unavailability of outcomes, funding source, and if applicable duration of follow-up). Provide (main) citations for each study. Where applicable, also report similar study characteristics for any studies not providing IPD.                                                                  | Appendix      |
| IPD integrity                    | A3 | Report any important issues identified in checking IPD or state that there were none.                                                                                                                                                                                                                                                                                                                                                                             | 10 & Fig 1    |
| Risk of bias within studies      | 19 | Present data on risk of bias assessments. If applicable, describe whether data checking led to the up-weighting or down-weighting of these assessments. Consider how any potential bias impacts on the robustness of meta-analysis conclusions.                                                                                                                                                                                                                   | 10 & Appendix |
| Results of individual studies    | 20 | For each comparison and for each main outcome (benefit or harm), for each individual study report the number of eligible participants for which data were obtained and show simple summary data for each intervention group (including, where applicable, the number of events), effect estimates and confidence intervals. These may be tabulated or included on a forest plot.                                                                                  | 10; Appendix  |
| Results of syntheses             | 21 | Present summary effects for each meta-analysis undertaken, including confidence intervals and measures of statistical heterogeneity. State whether the analysis was pre-specified, and report the numbers of studies and participants and, where applicable, the number of events on which it is based.                                                                                                                                                           | 10-12         |
|                                  |    | When exploring variation in effects due to patient or study characteristics, present summary interaction estimates for each characteristic examined, including confidence intervals and measures of statistical heterogeneity. State whether the analysis was pre-specified. State whether any interaction is consistent across trials.                                                                                                                           | 10-12         |
|                                  |    | Provide a description of the direction and size of effect in terms meaningful to those who would put findings into practice.                                                                                                                                                                                                                                                                                                                                      | 10-12         |
| Risk of bias across studies      | 22 | Present results of any assessment of risk of bias relating to the accumulated body of evidence, including any pertaining to the availability and representativeness of available studies, outcomes or other variables.                                                                                                                                                                                                                                            | 10 & Appendix |
| Additional analyses              | 23 | Give results of any additional analyses (e.g. sensitivity analyses). If applicable, this should also include any analyses that incorporate aggregate data for studies that do not have IPD. If applicable, summarise the main meta-analysis results following the inclusion or exclusion of studies for which IPD were not available.                                                                                                                             | Appendix      |
| <b>Discussion</b>                |    |                                                                                                                                                                                                                                                                                                                                                                                                                                                                   |               |
| Summary of evidence              | 24 | Summarise the main findings, including the strength of evidence for each main outcome.                                                                                                                                                                                                                                                                                                                                                                            | 13-15         |
| Strengths and limitations        | 25 | Discuss any important strengths and limitations of the evidence including the benefits of access to IPD and any limitations arising from IPD that were not available.                                                                                                                                                                                                                                                                                             | 15            |

|                |    |                                                                                                                                               |       |
|----------------|----|-----------------------------------------------------------------------------------------------------------------------------------------------|-------|
| Conclusions    | 26 | Provide a general interpretation of the findings in the context of other evidence.                                                            | 13-15 |
| Implications   | A4 | Consider relevance to key groups (such as policy makers, service providers and service users). Consider implications for future research.     | 13-15 |
| <b>Funding</b> |    |                                                                                                                                               |       |
| Funding        | 27 | Describe sources of funding and other support (such as supply of IPD), and the role in the systematic review of those providing such support. | 9     |

© Reproduced with permission of the PRISMA IPD Group, which encourages sharing and reuse for non-commercial purposes

## Box 1. Search strategy

### Search strategy

All prospective *P. vivax* antimalarial clinical trials with a minimum of 28 days follow up, published between Jan 1, 2000 and March 22, 2017 were identified by the application of the key terms (listed below) through Medline (Pubmed), Web of Science, Embase and the Cochrane Database of Systematic Reviews. Abstracts of all references containing any mention of antimalarial drugs were manually checked to confirm prospective clinical trials, with review of full text when needed. Studies on prevention, prophylaxis, reviews, animal studies, patients with severe malaria, where schizontocidal treatment was unsupervised or where data were extracted retrospectively from medical records outside of a planned trial were excluded. The year of the study was taken as the year in which the paper was published, although the start and end date of patient enrolment were also recorded. The review process was undertaken by two independent investigators who also performed data extraction (RJC and RNP), and is documented in more detail in Commons *et al*, Int J Parasitol Drug Res 2017.<sup>14</sup>

### Key terms:

Literature search (conducted March 2017) with the following key terms (version undertaken in Pubmed): (malaria OR plasmod\*) AND (amodiaquine OR atovaquone OR artemisinin OR arteether OR artesunate OR artemether OR artemotil OR azithromycin OR artekin OR chloroquine OR chlorproguanil OR cycloguanil OR clindamycin OR coartem OR dapsone OR dihydroartemisinin OR duo-cotecxin OR doxycycline OR halofantrine OR lumefantrine OR lariam OR malarone OR mefloquine OR naphthoquine OR naphthoquinone OR piperazine OR primaquine OR proguanil OR pyrimethamine OR pyronaridine OR quinidine OR quinine OR riamet OR sulphadoxine OR tetracycline OR tafenoquine).

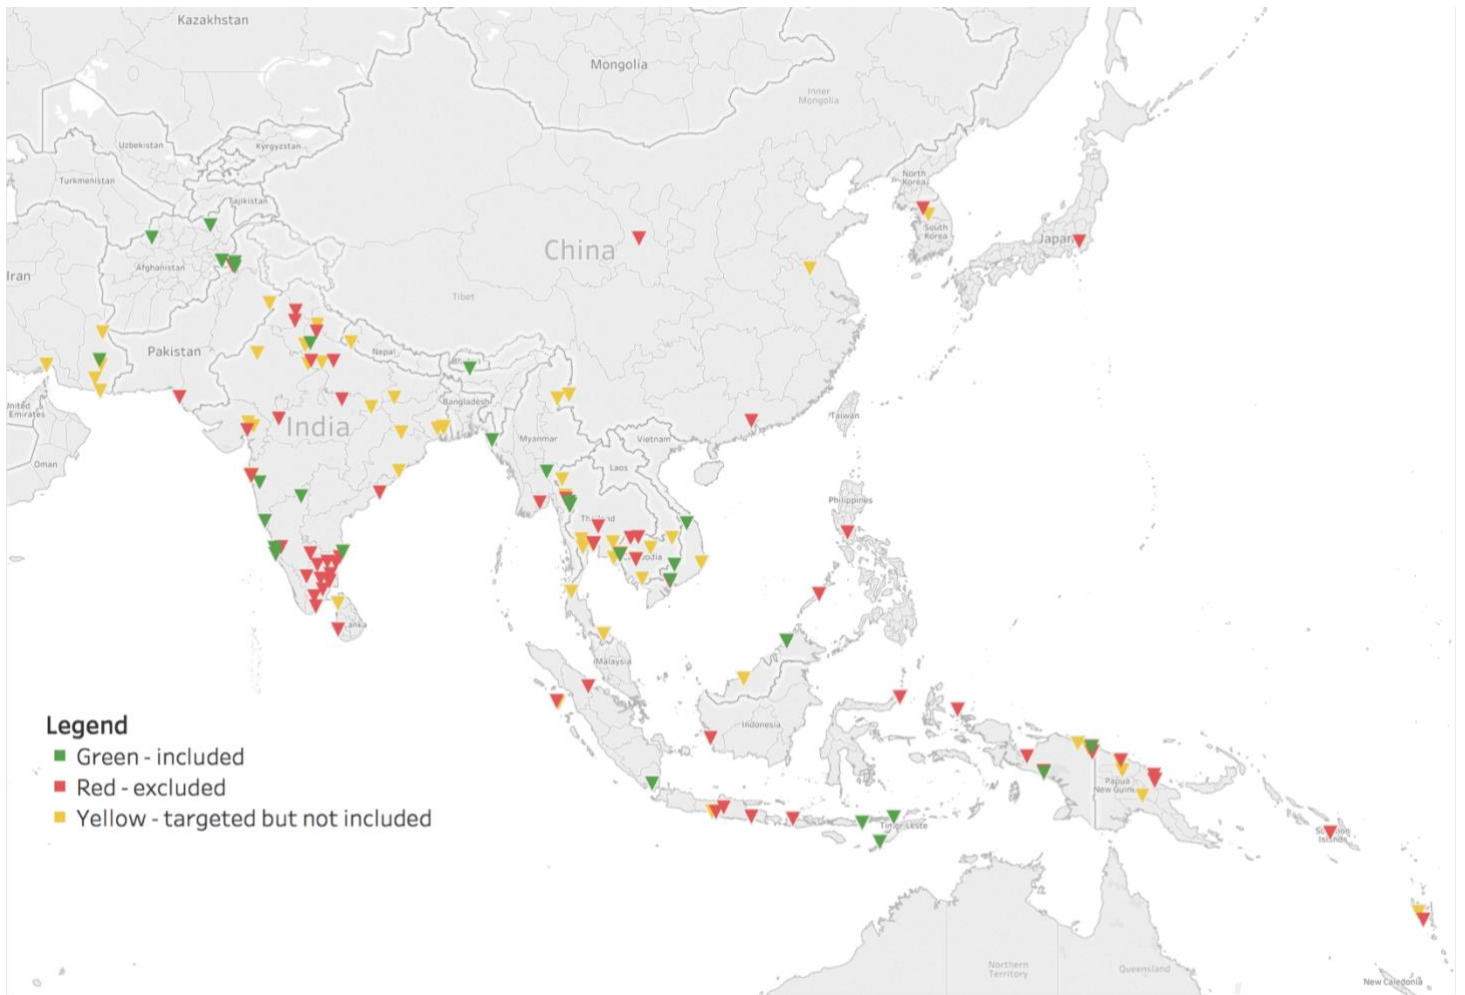

**Figure S1. Study sites for clinical trials – Asia-Pacific Region**

Studies of prisoners, travelers and soldiers are marked at the location of the study site.



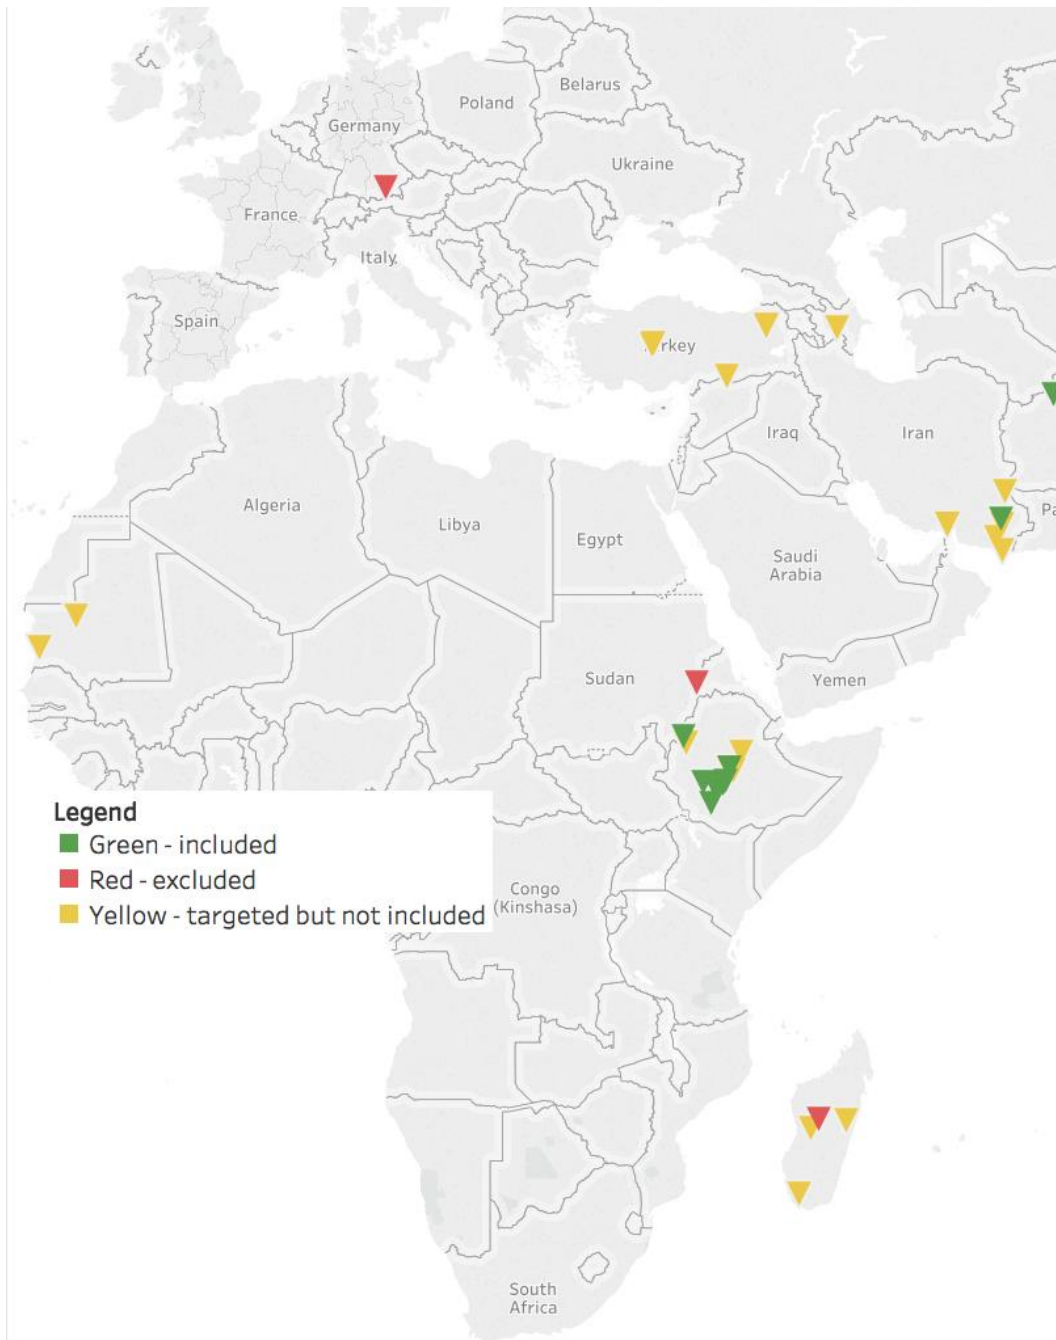

**Figure S2. Study sites for clinical trials – Africa and Europe**

Studies of prisoners, travelers and soldiers are marked at the location of the study site.

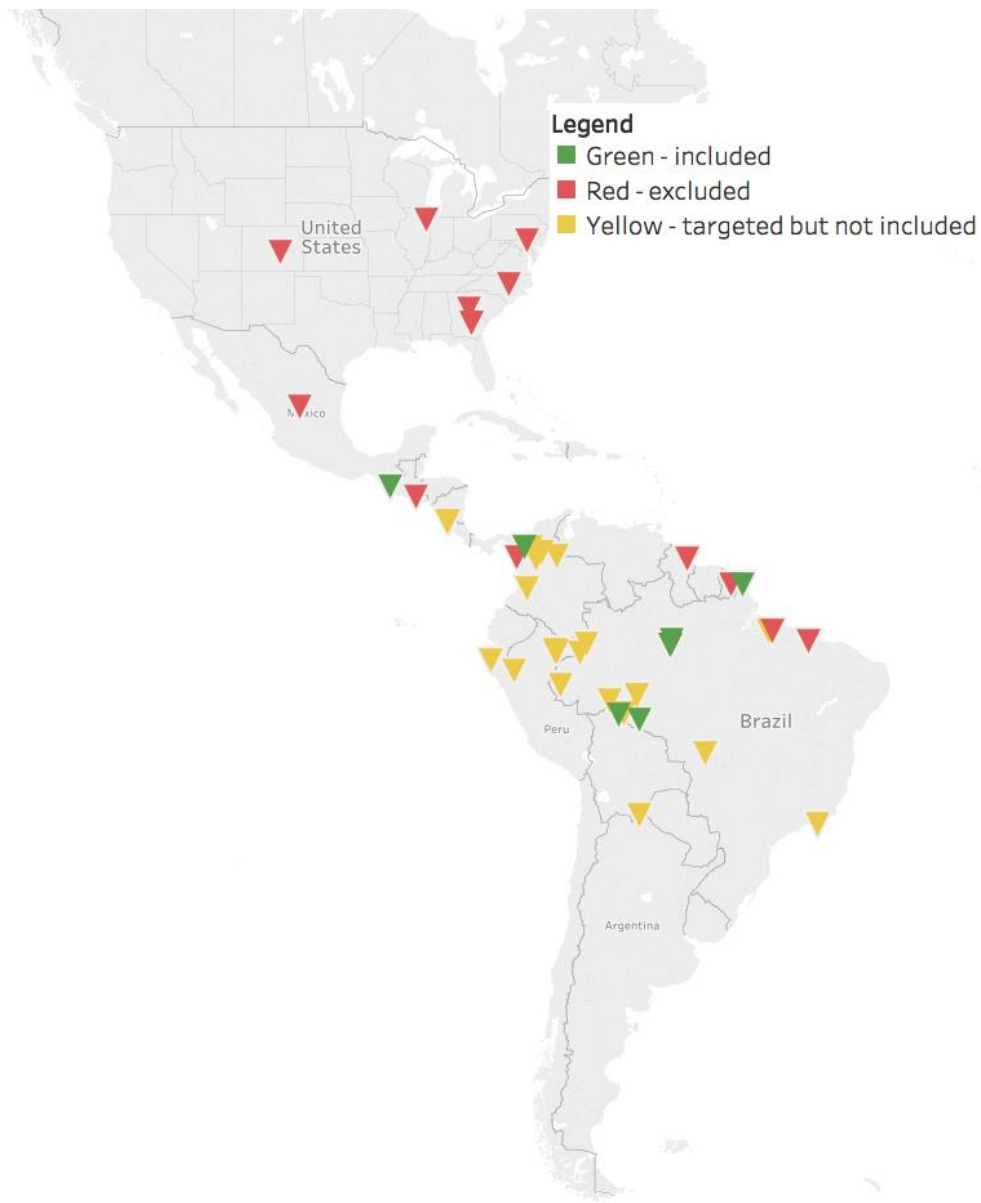

**Figure S3. Study sites for clinical trials – The Americas**

Studies of prisoners, travelers and soldiers are marked at the location of the study site.

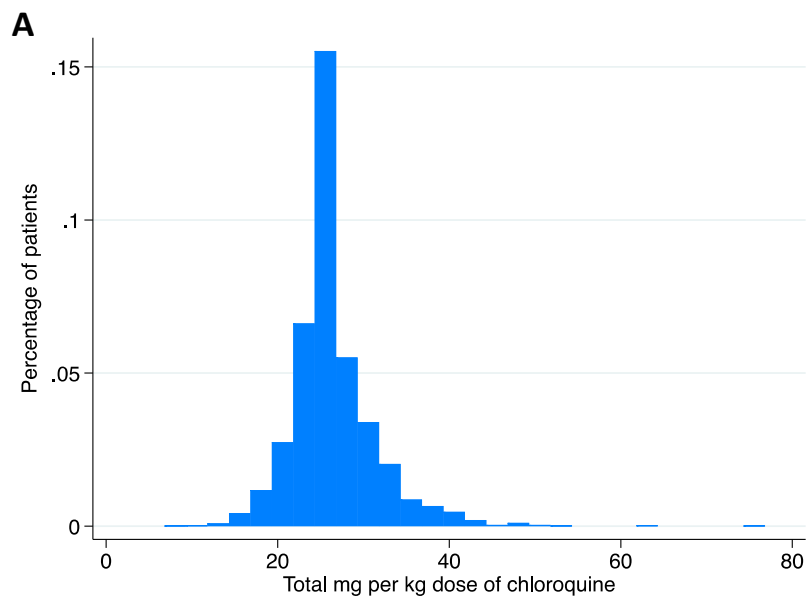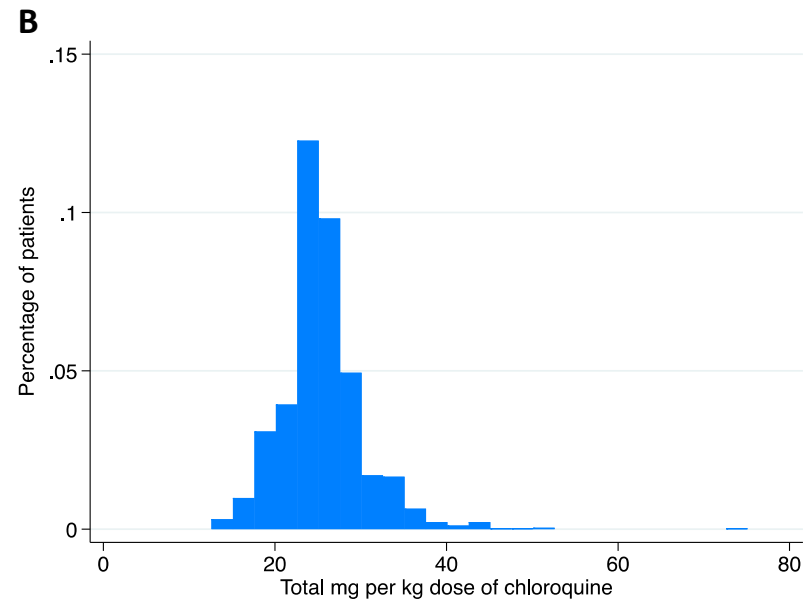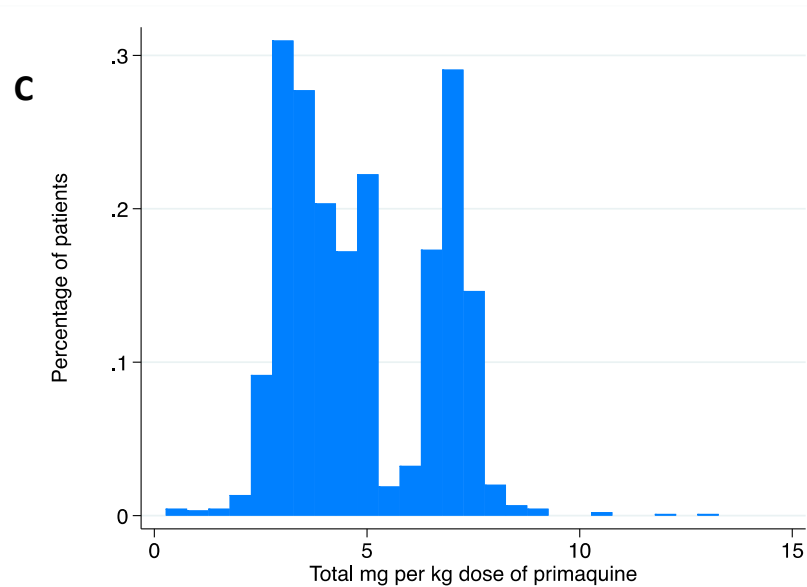

**Figure S4. Histogram of drug dosing for (A) chloroquine in patients receiving chloroquine alone, (B) chloroquine in patients receiving chloroquine plus early primaquine and (C) primaquine in patients receiving chloroquine plus early primaquine.**

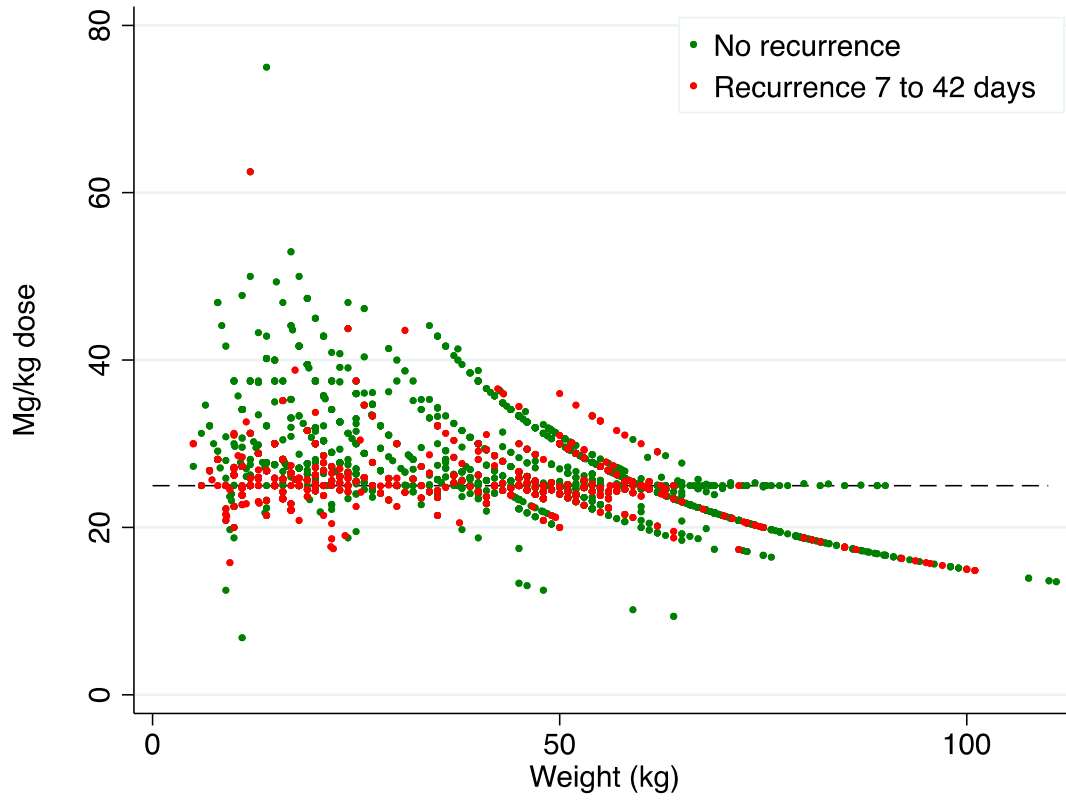

**Figure S5. Mg/kg drug dosing of chloroquine by bodyweight in patients receiving chloroquine alone.**  
Dashed line: 25 mg/kg dose of chloroquine (current recommended dose).

### A. Day 28

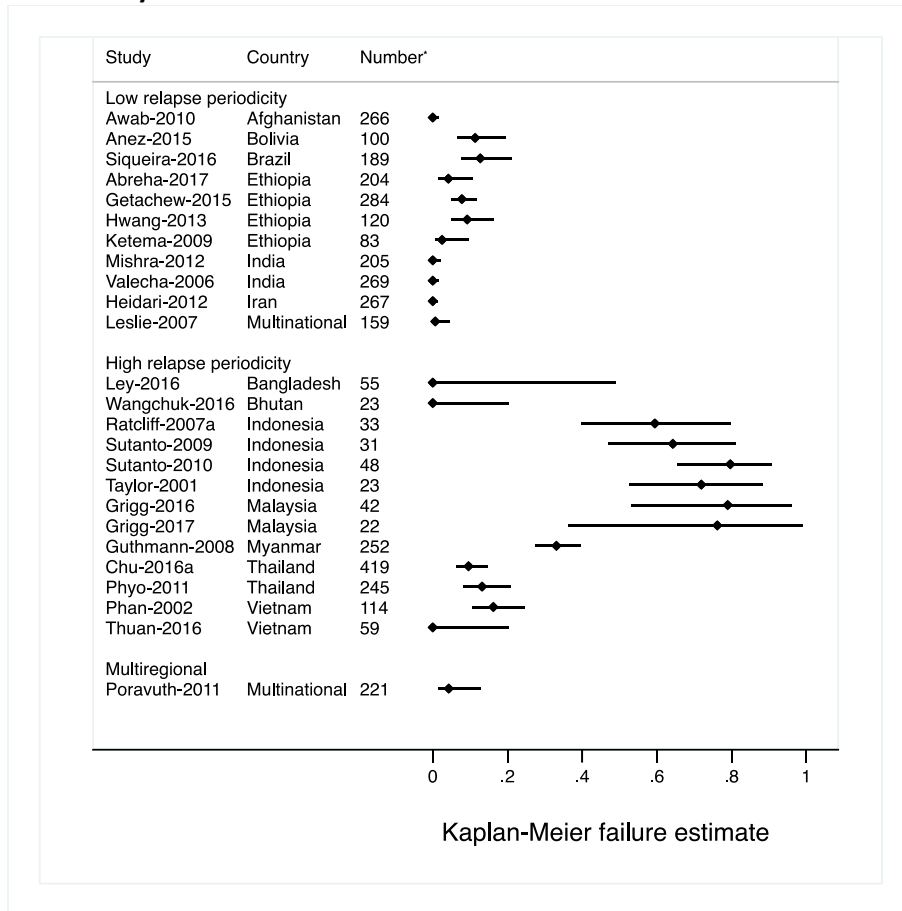

### B. Day 42

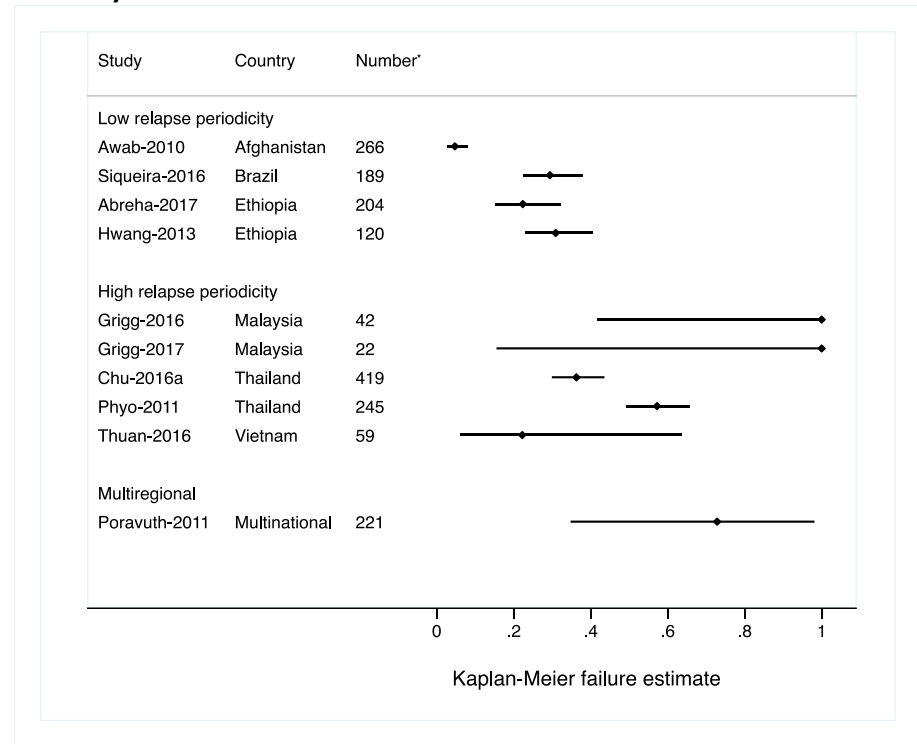

**Figure S6. Risk of recurrence by study at day 28 and 42 in patients receiving chloroquine alone**

\* Number refers to the total number of patients available for analysis from the study; Where a Kaplan-Meier failure estimate for day 28 was not available due to no failures having occurred, confidence intervals were generated using Wilson's procedure for patients followed to day 28. Barber *et al* did not have any failures, or any patients followed until day 28.<sup>33</sup>

**Table S1. Reasons for studies not being included in analysis**

| <b>Reason</b>                                      | <b>Number of studies</b> | <b>Studies*</b> |
|----------------------------------------------------|--------------------------|-----------------|
| Published pre-2000                                 | 64                       | 13, 69-131      |
| No chloroquine treatment arm                       | 28                       | 132-159         |
| Adjunctive drug(s) used                            | 4                        | 160-163         |
| Study of pregnant women                            | 2                        | 164,165         |
| Data not available                                 | 8                        | 166-173         |
| Investigators unable to be contacted               | 15                       | 174-188         |
| Missing minimum data for inclusion                 | 7                        | 189-195         |
| Initial investigator response but no data provided | 7                        | 196-202         |
| No response from investigators                     | 64                       | 203-266         |

\* References of studies not included are provided in Appendix, page 38

**Table S2. Studies included in analysis**

| Author-year                       | Country               | Recruitment | Included in study |         |        | Follow up (days) | Treatment arms                 | Supervision         | Patients enrolled | Patients available | Patients included   | CQ dosing schedule                                                                          | CQ target (mg/kg) | CQ dose calculation method | Primaquine dosing                                        | Timing of primaquine | Published |
|-----------------------------------|-----------------------|-------------|-------------------|---------|--------|------------------|--------------------------------|---------------------|-------------------|--------------------|---------------------|---------------------------------------------------------------------------------------------|-------------------|----------------------------|----------------------------------------------------------|----------------------|-----------|
|                                   |                       |             | <5yrs             | 5-15yrs | >15yrs |                  |                                |                     |                   |                    |                     |                                                                                             |                   |                            |                                                          |                      |           |
| Taylor-2001 <sup>19</sup>         | Indonesia             | 1995-1998   | No                | No      | Yes    | 28               | CQ, CQ+Doxy, Doxy              | Full                | 63                | 64                 | 23                  | Day 1: 10mg/kg, Day 2: 10mg/kg, Day 3: 5mg/kg                                               | 25                | Per protocol               | 14day-High Dose                                          | End of Study         | Yes       |
| Phan-2002 <sup>20</sup>           | Vietnam               | 1997-2000   | No                | No      | Yes    | 28               | CQ, Art                        | Full                | 226               | 232                | 114                 | Day 1: 15mg/kg, Day 2: 5mg/kg, Day 3: 5mg/kg                                                | 25                | Per protocol               | 5day-Very Low Dose                                       | End of Study         | Yes       |
| Valecha-2006 <sup>21</sup>        | India                 | 2002        | Yes               | Yes     | Yes    | 28               | CQ                             | Full                | 287               | 287                | 269                 | 25mg/kg total 3 days                                                                        | 25                | Tablet count               | -                                                        | -                    | Yes       |
| Leslie-2007 <sup>22</sup>         | Afghanistan, Pakistan | 2004-2006   | Yes               | Yes     | Yes    | 28               | CQ, Chlorproguanil-dapsone, SP | Full                | 767               | 767                | 159                 | 25mg/kg over 3 days                                                                         | 25                | Per protocol               | -                                                        | -                    | Yes       |
| Ratcliff-2007a <sup>23</sup>      | Indonesia             | 2004        | Yes               | Yes     | Yes    | 28               | CQ                             | Full                | 40                | 61                 | 33                  | 25mg/kg over 3 days                                                                         | 25                | Tablet count               | 14day-Low Dose                                           | End of Study         | Yes       |
| Guthmann-2008 <sup>24</sup>       | Myanmar               | 2002-2003   | Yes               | Yes     | Yes    | 28               | CQ                             | Full                | 252               | 252                | 252                 | Day 1: 10mg/kg, Day 2: 10mg/kg, Day 3: 5mg/kg                                               | 25                | Per protocol               | -                                                        | -                    | Yes       |
| Leslie-2008 <sup>25</sup>         | Pakistan              | 2004-2007   | Yes               | Yes     | Yes    | 365              | CQ, CQ+PQ, CQ+PQ               | Full                | 200               | 210                | 122                 | Day 1: 10mg/kg, Day 2: 10mg/kg, Day 3: 5mg/kg                                               | 25                | Per protocol               | None, 14 day High Dose; weekly over 8 weeks (excluded)   | Day 0                | Yes       |
| Ketema-2009 <sup>26</sup>         | Ethiopia              | 2007-2008   | No                | Yes     | Yes    | 28               | CQ                             | Full                | 84                | 84                 | 83                  | Day 1: 10mg/kg, Day 2: 10mg/kg, Day 3: 5mg/kg                                               | 25                | Tablet count               | -                                                        | -                    | Yes       |
| Sutanto-2009 <sup>27</sup>        | Indonesia             | 2001-2002   | Yes               | Yes     | Yes    | 28               | CQ                             | Full                | 36                | 31                 | 31                  | Day 1: 10mg/kg, Day 2: 10mg/kg, Day 3: 5mg/kg                                               | 25                | Tablet count               | Primaquine                                               | End of Study         | Yes       |
| Awab-2010 <sup>28</sup>           | Afghanistan           | 2007-2009   | Yes               | Yes     | Yes    | 56               | CQ, DP                         | Full                | 536               | 536                | 266                 | Day 1: 10mg/kg, Day 2: 10mg/kg, Day 3: 5mg/kg                                               | 25                | Tablet count               | -                                                        | -                    | Yes       |
| Sutanto-2010 <sup>29</sup>        | Indonesia             | 2002        | Yes               | Yes     | Yes    | 28               | CQ                             | Full                | 31                | 49                 | 48                  | Day 1: 10mg/kg, Day 2: 10mg/kg, Day 3: 5mg/kg                                               | 25                | Tablet count               | -                                                        | -                    | Yes       |
| Phyo-2011 <sup>30</sup>           | Thailand              | 2007-2008   | Yes               | Yes     | Yes    | 63               | CQ, DP                         | Full                | 492               | 498                | 245                 | Day 1: 10mg/kg, Day 2: 10mg/kg, Day 3: 5mg/kg                                               | 25                | Tablet count               | 14day-High Dose                                          | End of Study         | Yes       |
| Poravuth-2011 <sup>31</sup>       | Multicentred          | 2007-2008   | Yes               | Yes     | Yes    | 42               | CQ, AS+Pyr                     | Full                | 456               | 456                | 221                 | Day 1: 10mg/kg, Day 2: 10mg/kg, Day 3: 5mg/kg                                               | 25                | Tablet count               | 14day-Low Dose                                           | Day 28               | Yes       |
| Heidari-2012 <sup>51</sup>        | Iran                  | 2010        | Yes               | Yes     | Yes    | 28               | CQ                             | Full                | 285               | 270                | 267                 | Day 1: 10mg/kg, Day 2: 10mg/kg, Day 3: 5mg/kg                                               | 25                | Per protocol               | Weekly over 8 weeks                                      | End of Study         | Yes       |
| Mishra-2012 <sup>32</sup>         | India                 | 2009-2010   | Yes               | Yes     | Yes    | 28               | CQ                             | Full                | 210               | 211                | 205                 | 25mg/kg over 3 days                                                                         | 25                | Tablet count               | 14day-Low Dose                                           | End of Study         | Yes       |
| Barber-2013 <sup>33</sup>         | Malaysia              | 2010-2011   | No                | Yes     | Yes    | 43               | CQ+PQ, varied                  | Not stated          | 43                | 86                 | 13                  | Hour 0: 10mg/kg, Hour 6: 5mg/kg, Hour 24: 5mg/kg, Hour 48: 5mg/kg                           | 25                | Tablet count               | 14day-High Dose                                          | Day 0                | Yes       |
| Hwang-2013 <sup>34</sup>          | Ethiopia              | 2009-2010   | Yes               | Yes     | Yes    | 42               | CQ, AL                         | Full CQ; Partial AL | 242               | 242                | 120                 | Day 1: 10mg/kg, Day 2: 10mg/kg, Day 3: 5mg/kg                                               | 25                | Per protocol               | -                                                        | -                    | Yes       |
| Marques-2014 <sup>35</sup>        | Brazil                | 2007-2008   | No                | Yes     | Yes    | 28               | CQ+PQ                          | Full                | 135               | 154                | 135                 | Day 1: 10mg/kg, Day 2: 7.5mg/kg, Day 3: 7.5mg/kg                                            | 25                | Per protocol               | 7 day-Low Dose                                           | Day 0                | Yes       |
| Anez-2015 <sup>36</sup>           | Bolivia               | 2011        | No                | Yes     | Yes    | 28               | CQ                             | Full                | 100               | 100                | 100                 | Day 1: 10mg/kg, Day 2: 10mg/kg, Day 3: 5mg/kg                                               | 25                | Tablet count               | 7 day-Low Dose                                           | Day 28               | Yes       |
| Getachew-2015 <sup>37</sup>       | Ethiopia              | 2010-2013   | Yes               | Yes     | Yes    | 28               | CQ                             | Full                | 288               | 288                | 284                 | Day 1: 10mg/kg, Day 2: 10mg/kg, Day 3: 5mg/kg                                               | 25                | Tablet count               | -                                                        | -                    | Yes       |
| Gomes-2015 <sup>38</sup>          | Brazil                | 2011-2012   | No                | No      | Yes    | 28               | CQ+PQ                          | Partial CQ and PQ   | 103               | 94                 | 93                  | Day 1: 10mg/kg, Day 2: 7.5mg/kg, Day 3: 7.5mg/kg                                            | 25                | Per protocol               | 7 day-Low Dose                                           | Day 0                | Yes       |
| Gonzalez-Ceron-2015 <sup>39</sup> | Mexico                | 2008-2009   | Yes               | Yes     | Yes    | 365              | (1) CQ+PQ, (2) CQ+PQ           | Full                | 153               | 159                | 88 (arm 2 excluded) | (1) Day 1: 10mg/kg, Day 2: 10mg/kg, Day 3: 5mg/kg; (2) 80mg/kg intermittently over 8 months | (1) 25; (2) 80    | Tablet count               | 14 day-Low Dose; intermittently over 8 months (excluded) | Day 0                | Yes       |
| Lidia-2015 <sup>40</sup>          | Indonesia             | 2013        | No                | No      | Yes    | 42               | CQ+PQ, DP+PQ                   | Full                | 51                | 51                 | 26                  | Day 1: 10mg/kg, Day 2: 10mg/kg, Day 3: 5mg/kg                                               | 25                | Tablet count               | 14 day-Low Dose                                          | Day 0                | Yes       |

|                                         |            |           |     |     |     |     |                               |                                       |     |     |     |                                                                                                                             |    |              |                                                       |              |                               |
|-----------------------------------------|------------|-----------|-----|-----|-----|-----|-------------------------------|---------------------------------------|-----|-----|-----|-----------------------------------------------------------------------------------------------------------------------------|----|--------------|-------------------------------------------------------|--------------|-------------------------------|
| Rishikesh-2015 <sup>41</sup>            | India      | 2012-2014 | No  | No  | Yes | 28  | CQ+PQ                         | Full CQ;<br>Partial PQ                | 125 | 125 | 124 | 25mg/kg total 3 days                                                                                                        | 25 | Tablet count | 14day-Low Dose;<br>weekly over 8 weeks<br>(excluded)  | Day 0        | Yes                           |
| Thanh-2015 <sup>42</sup>                | Vietnam    | 2009-2011 | Yes | Yes | Yes | 28  | CQ+PQ                         | Full                                  | 260 | 260 | 260 | Day 1: 10mg/kg, Day 2:<br>10mg/kg, Day 3: 5mg/kg<br>Hour 0: 10mg/kg, Hour 6:<br>5mg/kg, Hour 24: 5mg/kg,<br>Hour 48: 5mg/kg | 25 | Tablet count | 10day-High Dose                                       | Day 0        | Yes                           |
| Grigg-2016 <sup>43</sup>                | Malaysia   | 2012-2014 | Yes | Yes | Yes | 42  | AS+MQ+PQ,<br>CQ+PQ            | Full                                  | 103 | 103 | 42  | 5mg/kg, Hour 24: 5mg/kg,<br>Hour 48: 5mg/kg                                                                                 | 25 | Tablet count | 14day-High Dose                                       | Day 28       | Yes                           |
| Ley-2016 <sup>44</sup>                  | Bangladesh | 2014-2015 | Yes | Yes | Yes | 30  | AL+PQ, CQ+PQ                  | Partial AL;<br>Full CQ;<br>Partial PQ | 55  | 66  | 55  | Day 1: 10mg/kg, Day 2:<br>10mg/kg, Day 3: 5mg/kg                                                                            | 25 | Tablet count | 14day-Low Dose                                        | Day 2        | Yes                           |
| Pereira-2016 <sup>45</sup>              | Brazil     | 2013-2015 | No  | No  | Yes | 28  | CQ+PQ                         | Partial CQ<br>and PQ                  | 88  | 88  | 86  | Day 1: 10mg/kg, Day 2:<br>7.5mg/kg, Day 3: 7.5mg/kg                                                                         | 25 | Tablet count | 7-9 day Low-Dose                                      | Day 0        | Yes                           |
| Saravu-2016 <sup>46</sup>               | India      | 2012-2015 | No  | No  | Yes | 28  | CQ+PQ,<br>CQ+PQ(weekly)       | Partial CQ<br>and PQ                  | 161 | 161 | 136 | 25mg/kg total 3 days                                                                                                        | 25 | Tablet count | 14 day-Low Dose;<br>weekly over 8 weeks<br>(excluded) | Day 0        | Yes                           |
| Thuan-2016 <sup>47</sup>                | Vietnam    | 2013-2014 | Yes | Yes | Yes | 63  | CQ, DP                        | Full                                  | 128 | 128 | 59  | 25mg/kg total given at hour<br>0, 8, 24, 32, 48                                                                             | 25 | Tablet count | 14day-Low Dose                                        | End of Study | Yes                           |
| Wangchuk-<br>2016 <sup>48</sup>         | Bhutan     | 2013-2015 | Yes | Yes | Yes | 365 | CQ+PQ                         | Full                                  | 24  | 28  | 23  | Day 1: 10mg/kg, Day 2:<br>10mg/kg, Day 3: 5mg/kg                                                                            | 25 | Tablet count | 14day-Low Dose                                        | Day 28       | Yes                           |
| Zuluaga-<br>Idarraga-2016 <sup>49</sup> | Colombia   | 2012-2014 | Yes | Yes | Yes | 180 | CQ+PQ                         | Full                                  | 87  | 87  | 85  | Day 1: 10mg/kg, Day 2:<br>7.5mg/kg, Day 3: 7.5mg/kg                                                                         | 25 | Tablet count | 14 day-Low Dose                                       | Day 0        | Yes                           |
| Abreha-2017 <sup>12</sup>               | Ethiopia   | 2012-2016 | Yes | Yes | Yes | 365 | AL, AL+PQ, CQ,<br>CQ+PQ       | Partial AL;<br>Full CQ;<br>Partial PQ | 398 | 398 | 204 | Day 1: 10mg/kg, Day 2:<br>10mg/kg, Day 3: 5mg/kg                                                                            | 25 | Tablet count | 14day-Low Dose                                        | Day 2        | After<br>literature<br>search |
| Chu-2017a                               | Thailand   | 2010-2012 | Yes | Yes | Yes | 365 | CQ, CQ+PQ, AS                 | Full                                  | 645 | 645 | 419 | Day 1: 10mg/kg, Day 2:<br>10mg/kg, Day 3: 5mg/kg                                                                            | 25 | Per protocol | None, 14 day High<br>Dose                             | Day 0        | No                            |
| Chu-2017b                               | Thailand   | 2012-2014 | Yes | Yes | Yes | 365 | DP+PQ, DP+PQ,<br>CQ+PQ, CQ+PQ | Full                                  | 680 | 680 | 339 | Day 1: 10mg/kg, Day 2:<br>10mg/kg, Day 3: 5mg/kg                                                                            | 25 | Per protocol | 7 day High-dose, 14<br>day High-dose                  | Day 0        | No                            |
| Grigg-2017                              | Malaysia   | 2013-2016 | No  | Yes | Yes | 42  | CQ+PQ, variable               | Not stated                            | 57  | 57  | 22  | Hour 0: 10mg/kg, Hour 6:<br>5mg/kg, Hour 24: 5mg/kg,<br>Hour 48: 5 mg/kg                                                    | 25 | Tablet count | 14day-High Dose                                       | Day 0        | No                            |
| Siqueira-2017 <sup>50</sup>             | Brazil     | 2012-2013 | Yes | Yes | Yes | 42  | AS+AQ, CQ                     | Full                                  | 380 | 380 | 189 | Day 1: 10mg/kg, Day 2:<br>7.5mg/kg, Day 3: 7.5mg/kg                                                                         | 25 | Tablet count | -                                                     | -            | Yes                           |

CQ – chloroquine; Doxy – doxycycline; Art – artemisinin; SP – Sulfadoxine-pyrimethamine; PQ – primaquine; AS – artesunate; Pyr – pyronaridine; AL – artemether-lumefantrine; DP – dihydroartemisinin-piperaquine



**Table S3. Study sites included in analysis**

| Author-Year                  | Country     | Study site            | Latitude | Longitude | Year Start | Year End | MAP PvPR % (2010)* | Publication estimate of prevalence                                                                   | Final prevalence classification | Region of relapse periodicity <sup>17</sup> | Final category of relapse periodicity <sup>†</sup> |
|------------------------------|-------------|-----------------------|----------|-----------|------------|----------|--------------------|------------------------------------------------------------------------------------------------------|---------------------------------|---------------------------------------------|----------------------------------------------------|
| Taylor-2001 <sup>19</sup>    | Indonesia   | Papua                 | -2.56    | 140.72    | 1995       | 1998     | 0.0                | Not stated                                                                                           | Low                             | 12                                          | High                                               |
| Phan-2002 <sup>20</sup>      | Vietnam     | Binh Thuan            | 10.82    | 106.73    | 1997       | 2000     | 0.5                | Not stated                                                                                           | Low                             | 10                                          | High                                               |
| Valecha-2006 <sup>21</sup>   | India       | Chennai               | 13.06    | 80.25     | 2002       | 2002     | 2.0                | Perennial; API 2001 - 5.2; 2002 - 5.9; 2003 - 6.2                                                    | Moderate                        | 8                                           | Low                                                |
| Valecha-2006 <sup>21</sup>   | India       | Gautam                | 28.76    | 77.63     | 2002       | 2002     | 2.6                | Seasonal API 2001 - 1.88; 2002 - 0.23; 2003 - 1.08                                                   | Moderate                        | 8                                           | Low                                                |
| Valecha-2006 <sup>21</sup>   | India       | Navi Mumbai           | 18.44    | 73.51     | 2002       | 2002     | 4.3                | Perennial; API 2002 - 3.69; 2003 - 2.27                                                              | High                            | 8                                           | Low                                                |
| Leslie-2007 <sup>22</sup>    | Afghanistan | Jalalabad             | 34.43    | 70.46     | 2004       | 2006     | 1.4                | Not stated                                                                                           | Low                             | 11                                          | Low                                                |
| Leslie-2007 <sup>22</sup>    | Pakistan    | Adizai                | 33.78    | 71.57     | 2004       | 2006     | 1.8                | Not stated                                                                                           | Moderate                        | 8                                           | Low                                                |
| Ratcliff-2007a <sup>23</sup> | Indonesia   | Timika                | -4.61    | 136.85    | 2004       | 2004     | 4.7                | Unstable; 279 per 1000 per year                                                                      | High                            | 12                                          | High                                               |
| Guthmann-2008 <sup>24</sup>  | Myanmar     | Dawei                 | 19.26    | 96.68     | 2002       | 2003     | 4.6                | Not stated                                                                                           | High                            | 10                                          | High                                               |
| Leslie-2008 <sup>25</sup>    | Pakistan    | Adizai                | 33.78    | 71.57     | 2004       | 2007     | 1.8                | Seasonal                                                                                             | Moderate                        | 8                                           | Low                                                |
| Leslie-2008 <sup>25</sup>    | Pakistan    | Baghicha              | 35.59    | 75.33     | 2004       | 2007     | 0.6                | Seasonal                                                                                             | Low                             | 11                                          | Low                                                |
| Leslie-2008 <sup>25</sup>    | Pakistan    | Khagan                | 34.78    | 73.53     | 2004       | 2007     | 1.2                | Seasonal                                                                                             | Low                             | 11                                          | Low                                                |
| Ketema-2009 <sup>26</sup>    | Ethiopia    | Serbo                 | 9.37     | 34.58     | 2007       | 2008     | 0.7                | Seasonal; 3925 to 22938 cases in population of 329629 from 2002 to 2007                              | Low                             | 7                                           | Low                                                |
| Sutanto-2009 <sup>27</sup>   | Indonesia   | Alor                  | -8.25    | 124.75    | 2001       | 2002     | 2.9                | Not stated                                                                                           | Moderate                        | 10                                          | High                                               |
| Awab-2010 <sup>28</sup>      | Afghanistan | Jalalabad             | 34.43    | 70.46     | 2007       | 2009     | 1.4                | Seasonal                                                                                             | Low                             | 11                                          | Low                                                |
| Awab-2010 <sup>28</sup>      | Afghanistan | Maimana               | 35.92    | 64.82     | 2007       | 2009     | 0.6                | Seasonal                                                                                             | Low                             | 11                                          | Low                                                |
| Awab-2010 <sup>28</sup>      | Afghanistan | Taloqan               | 36.74    | 69.54     | 2007       | 2009     | 0.4                | Seasonal                                                                                             | Low                             | 11                                          | Low                                                |
| Sutanto-2010 <sup>29</sup>   | Indonesia   | Lampung               | -5.53    | 105.24    | 2002       | 2002     | 0.5                | Not stated                                                                                           | Low                             | 10                                          | High                                               |
| Phyo-2011 <sup>30</sup>      | Thailand    | Mae Sot               | 16.72    | 98.58     | 2007       | 2008     | 4.0                | Low EIR <1; seasonal transmission                                                                    | High                            | 10                                          | High                                               |
| Poravuth-2011 <sup>31</sup>  | Cambodia    | Pailin                | 12.85    | 102.61    | 2007       | 2008     | 1.8                | Not stated                                                                                           | Moderate                        | 10                                          | High                                               |
| Poravuth-2011 <sup>31</sup>  | India       | Mangalore             | 12.87    | 74.84     | 2007       | 2008     | 2.7                | Not stated                                                                                           | Moderate                        | 8                                           | Low                                                |
| Poravuth-2011 <sup>31</sup>  | Indonesia   | Maumere               | -8.62    | 122.21    | 2007       | 2008     | 1.9                | Not stated                                                                                           | Moderate                        | 10                                          | High                                               |
| Poravuth-2011 <sup>31</sup>  | Thailand    | Mae Ramat             | 16.98    | 98.52     | 2007       | 2008     | 3.8                | Not stated                                                                                           | Moderate                        | 10                                          | High                                               |
| Poravuth-2011 <sup>31</sup>  | Thailand    | Mae Sot               | 16.72    | 98.58     | 2007       | 2008     | 4.0                | Not stated                                                                                           | High                            | 10                                          | High                                               |
| Heidari-2012 <sup>51</sup>   | Iran        | Sistan va Baluchistan | 27.53    | 60.59     | 2010       | 2010     | 0.5                | Seasonal                                                                                             | Low                             | 8                                           | Low                                                |
| Mishra-2012 <sup>32</sup>    | India       | Gulburga              | 17.39    | 76.87     | 2009       | 2010     | 2.9                | Not stated                                                                                           | Moderate                        | 8                                           | Low                                                |
| Mishra-2012 <sup>32</sup>    | India       | Mangalore             | 12.91    | 74.86     | 2009       | 2010     | 3.2                | Not stated                                                                                           | Moderate                        | 8                                           | Low                                                |
| Mishra-2012 <sup>32</sup>    | India       | North Goa             | 15.52    | 73.98     | 2009       | 2010     | 2.7                | Not stated                                                                                           | Moderate                        | 8                                           | Low                                                |
| Barber-2013 <sup>33</sup>    | Malaysia    | Sabah                 | 5.98     | 116.08    | 2010       | 2011     | 3.9                | Not stated                                                                                           | Moderate                        | 10                                          | High                                               |
| Hwang-2013 <sup>34</sup>     | Ethiopia    | Bishoftu              | 8.74     | 38.99     | 2009       | 2010     | 1.4                | Seasonal; parasite prevalence rates of 0.3 and 0.9% in all ages and 0.6% in Oromia in 5-18 year olds | Low                             | 7                                           | Low                                                |
| Hwang-2013 <sup>34</sup>     | Ethiopia    | Bulbula               | 7.72     | 38.65     | 2009       | 2010     | 2.2                | Seasonal; parasite prevalence rates of 0.3 and 0.9% in all ages and 0.6% in Oromia in 5-18 year olds | Moderate                        | 7                                           | Low                                                |
| Marques-2014 <sup>35</sup>   | Brazil      | Manaus                | -3.12    | -60.02    | 2007       | 2008     | 6.9                | Not stated                                                                                           | High                            | 3                                           | Low                                                |
| Anez-2015 <sup>36</sup>      | Bolivia     | Riberalta             | -11.01   | -66.06    | 2011       | 2011     | 4.9                | Not stated                                                                                           | High                            | 3                                           | Low                                                |
| Getachew-2015 <sup>37</sup>  | Ethiopia    | Arba Minch            | 6.01     | 37.54     | 2010       | 2013     | 1.1                | 2012 API: 20.3                                                                                       | Low                             | 7                                           | Low                                                |
| Getachew-2015 <sup>37</sup>  | Ethiopia    | Halaba                | 7.49     | 38.19     | 2010       | 2013     | 1.9                | 2012 API: 81.8                                                                                       | Moderate                        | 7                                           | Low                                                |
| Getachew-2015 <sup>37</sup>  | Ethiopia    | Shone                 | 7.14     | 37.95     | 2010       | 2013     | 1.8                | 2012 API: 41.0                                                                                       | Moderate                        | 7                                           | Low                                                |
| Getachew-2015 <sup>37</sup>  | Ethiopia    | Ziway                 | 7.92     | 38.72     | 2010       | 2013     | 1.9                | 2012 API: 35.4                                                                                       | Moderate                        | 7                                           | Low                                                |

|                                     |            |                   |        |        |      |      |     |                                                             |          |    |      |
|-------------------------------------|------------|-------------------|--------|--------|------|------|-----|-------------------------------------------------------------|----------|----|------|
| Gomes-2015 <sup>38</sup>            | Brazil     | Oiapoque          | 3.84   | -51.83 | 2011 | 2012 | 4.9 | API 246 in 2011                                             | High     | 3  | Low  |
| Gonzalez-Ceron -2015 <sup>39</sup>  | Mexico     | Cacahoatan        | 15.09  | -92.21 | 2008 | 2009 | 1.9 | Hypoendemic; variable; API 0.579-1.523 for 2003 to 2007     | Moderate | 2  | Low  |
| Gonzalez-Ceron -2015 <sup>39</sup>  | Mexico     | Fra Hidalgo       | 14.74  | -92.23 | 2008 | 2009 | 1.4 | Hypoendemic; variable; API 0.579-1.523 for 2003 to 2007     | Low      | 2  | Low  |
| Gonzalez-Ceron -2015 <sup>39</sup>  | Mexico     | Huehuetan         | 15.06  | -92.33 | 2008 | 2009 | 1.7 | Hypoendemic; variable; API 0.579-1.523 for 2003 to 2007     | Moderate | 2  | Low  |
| Gonzalez-Ceron -2015 <sup>39</sup>  | Mexico     | Tapachula         | 14.91  | -92.26 | 2008 | 2009 | 2.0 | Hypoendemic; variable; API 0.579-1.523 for 2003 to 2007     | Moderate | 2  | Low  |
| Gonzalez-Ceron -2015 <sup>39</sup>  | Mexico     | Tuxtla Chico      | 14.91  | -92.15 | 2008 | 2009 | 2.1 | Hypoendemic; variable; API 0.579-1.523 for 2003 to 2007     | Moderate | 2  | Low  |
| Lidia-2015 <sup>40</sup>            | Indonesia  | Kupang            | -10.18 | 123.61 | 2013 | 2013 | 0.9 | Not stated                                                  | Low      | 10 | High |
| Rishikesh-2015 <sup>41</sup>        | India      | Manipal           | 13.36  | 74.79  | 2012 | 2014 | 3.2 | Not stated                                                  | Moderate | 8  | Low  |
| Thanh-2015 <sup>42</sup>            | Vietnam    | Tra Leng          | 15.28  | 107.99 | 2009 | 2011 | 2.2 | Perennial; prevalence variable within region from <5 to 30% | Moderate | 10 | High |
| Grigg-2016 <sup>43</sup>            | Malaysia   | Kota Marudu       | 6.49   | 116.77 | 2012 | 2014 | 4.7 | Not stated                                                  | High     | 10 | High |
| Grigg-2016 <sup>43</sup>            | Malaysia   | Kudat             | 6.89   | 116.85 | 2012 | 2014 | 3.8 | Not stated                                                  | Moderate | 10 | High |
| Grigg-2016 <sup>43</sup>            | Malaysia   | Pitas             | 6.71   | 117.03 | 2012 | 2014 | 4.7 | Not stated                                                  | High     | 10 | High |
| Ley-2016 <sup>44</sup>              | Bangladesh | Alikadam Upazilla | 23.70  | 90.44  | 2014 | 2015 | 0.6 | Not stated                                                  | Low      | 10 | High |
| Pereira-2016 <sup>45</sup>          | Brazil     | Rondonia          | -11.51 | -63.58 | 2013 | 2015 | 4.8 | Not stated                                                  | High     | 3  | Low  |
| Saravu-2016 <sup>46</sup>           | India      | Udupi taluk       | 13.48  | 74.71  | 2012 | 2015 | 2.6 | API estimated at 2.5                                        | Moderate | 8  | Low  |
| Thuan-2016 <sup>47</sup>            | Vietnam    | Bu Gia Map        | 12.04  | 107.05 | 2013 | 2014 | 2.4 | High                                                        | Moderate | 10 | High |
| Thuan-2016 <sup>47</sup>            | Vietnam    | Dak O             | 12.00  | 107.50 | 2013 | 2014 | 1.3 | High                                                        | Moderate | 10 | High |
| Wangchuk-2016 <sup>48</sup>         | Bhutan     | Pemagatshel       | 27.04  | 91.45  | 2013 | 2015 | 0.9 | Low                                                         | Low      | 10 | High |
| Wangchuk-2016 <sup>48</sup>         | Bhutan     | Samdrupjongkhar   | 26.93  | 91.64  | 2013 | 2015 | 1.0 | Low                                                         | Low      | 10 | High |
| Wangchuk-2016 <sup>48</sup>         | Bhutan     | Sarpang           | 26.86  | 90.27  | 2013 | 2015 | 0.7 | Low                                                         | Low      | 10 | High |
| Wangchuk-2016 <sup>48</sup>         | Bhutan     | Trongsa           | 27.50  | 90.51  | 2013 | 2015 | 0.5 | Low                                                         | Low      | 10 | High |
| Wangchuk-2016 <sup>48</sup>         | Bhutan     | Wangdiphodrang    | 27.49  | 89.90  | 2013 | 2015 | 0.5 | Low                                                         | Low      | 10 | High |
| Zuluaga-Idarraga-2016 <sup>49</sup> | Colombia   | Turbo             | 8.10   | -76.73 | 2012 | 2014 | 6.0 | Seasonal; API 65 in 2007 and 3 in 2014                      | Moderate | 2  | Low  |
| Abreha-2017 <sup>12</sup>           | Ethiopia   | Bishoftu          | 8.73   | 39.01  | 2012 | 2016 | 1.4 | Not available                                               | Low      | 7  | Low  |
| Abreha-2017 <sup>12</sup>           | Ethiopia   | Batu              | 6.67   | 39.42  | 2012 | 2016 | 0.9 | Not available                                               | Low      | 7  | Low  |
| Chu-2017a                           | Thailand   | Mae Sot           | 16.72  | 98.58  | 2010 | 2012 | 4.0 | Not stated                                                  | High     | 10 | High |
| Chu-2017b                           | Thailand   | Mae Sot           | 16.72  | 98.58  | 2012 | 2014 | 4.0 | Not stated                                                  | High     | 10 | High |
| Grigg-2017                          | Malaysia   | Kudat             | 6.89   | 116.85 | 2013 | 2016 | 3.8 | Not available                                               | Moderate | 10 | High |
| Siqueira-2017 <sup>50</sup>         | Brazil     | Manaus            | -3.12  | -60.02 | 2012 | 2013 | 6.9 | Not stated                                                  | High     | 3  | Low  |

API – annual parasite index; EIR – entomological inoculation rate; \**P. vivax* parasite rate estimated by Malaria Atlas Project (MAP) for 2010; †Short relapse periodicity  $\leq 47$  days

**Table S4. Studies targeted for the analysis but not included**

| First Author                           | Treatment arms | Sites | Region       | Country    | Enrolled | Follow up (days) | Randomised | Recruitment period | Treatment arms*                                | Pv patients enrolled | Pv treated with CQ+/-PQ | Female (%) | Age         |                | Reason not included                   |
|----------------------------------------|----------------|-------|--------------|------------|----------|------------------|------------|--------------------|------------------------------------------------|----------------------|-------------------------|------------|-------------|----------------|---------------------------------------|
|                                        |                |       |              |            |          |                  |            |                    |                                                |                      |                         |            | Mean (SD)   | Median (range) |                                       |
| Bergonzoli-2000 <sup>174</sup>         | 4              | 2     | The Americas | Costa Rica | 132      | 180              | Yes        | 1994               | CQ3+PQ14; CQ9+PQ9; CQ5+PQ5; CQ1+PQ1            | 132                  | 132                     | Not stated | 30.5 (-)    |                | Contact details not up to date        |
| Pukrittayakamee-2000 <sup>203</sup>    | 9              | 1     | Asia-Pacific | Thailand   | 207      | 28               | Yes        | 1992-1998          | CQ2+PQ14; CQ2; PQ14; Qu; Mfq; Halo; AS; Am; SP | 207                  | 60                      | 0          | 25 (9)      |                | No response from investigators        |
| Singh-2000 <sup>204</sup>              | 1              | 1     | Asia-Pacific | India      | 75       | 28               | No         | 1998-1999          | CQ3+PQ14                                       | 75                   | 75                      | 29.3       | 28 (14)     |                | No response from investigators        |
| Taylor-2000 <sup>166</sup>             | 2              | 1     | Asia-Pacific | Vietnam    | 54       | 28               | No         | 1995               | CQ3; Halo                                      | 54                   | 29                      | 51.7       | Not stated  | 14 (5-40)      | Data not available                    |
| Villalobos-Salcedo-2000 <sup>205</sup> | 2              | 1     | The Americas | Brazil     | 79       | 28               | Yes        | 1998               | CQ3+PQ14; CQ5+PQ5                              | 79                   | 79                      | 21.5       | 31.7 (-)    |                | No response from investigators        |
| Abdon-2001 <sup>175</sup>              | 3              | 1     | The Americas | Brazil     | 120      | 180              | Yes        | 1994-1995          | CQ3+PQ14; CQ1+PQ7; CQ1+PQ5                     | 120                  | 120                     | 37.5       | 27.3 (-)    |                | Contact details not up to date        |
| Adak-2001 <sup>167</sup>               | 3              | 1     | Asia-Pacific | India      | 663      | 365              | Yes        | Not stated         | CQ3; CQ3+PQ5; CQ3+BQ5                          | 663                  | 444                     | Not stated | Not stated  |                | Data not available                    |
| Buchachart-2001 <sup>206</sup>         | 1              | 1     | Asia-Pacific | Thailand   | 593      | 28               | No         | 1992-1997          | CQ3+PQ14                                       | 593                  | 593                     | 37.1       | 25 (-)      |                | No response from investigators        |
| Dua-2001 <sup>207</sup>                | 1              | 4     | Asia-Pacific | India      | 5541     | 540              | No         | 1987-2000          | CQ2+PQ5                                        | 5541                 | 5541                    | Not stated | Not stated  |                | No response from investigators        |
| Duarte-2001 <sup>208</sup>             | 1              | 1     | The Americas | Brazil     | 50       | 180              | No         | 1997-1998          | CQ3+PQ14                                       | 50                   | 50                      | 24         | 31.8 (12.8) |                | No response from investigators        |
| Soto-2001 <sup>209</sup>               | 1              | 2     | The Americas | Colombia   | 28       | 28               | No         | Not stated         | CQ3                                            | 28                   | 28                      | 0          | Not stated  |                | No response from investigators        |
| Baird-2002 <sup>202</sup>              | 1              | 1     | The Americas | Guyana     | 13       | 28               | No         | 1998               | CQ3                                            | 13                   | 13                      | 21.9       | 31 (-)      |                | Initial response but no data provided |
| Blair-Trujillo-2002 <sup>216</sup>     | 1              | 1     | The Americas | Colombia   | 33       | 28               | No         | 2001               | CQ3                                            | 33                   | 33                      | Not stated | 20 (12)     |                | No response from investigators        |
| Castillo-2002 <sup>212</sup>           | 1              | 1     | The Americas | Colombia   | 50       | 28               | No         | 1998-1999          | CQ3                                            | 50                   | 50                      | 84.1       | 28 (-)      |                | No response from investigators        |
| Congpuong-2002 <sup>213</sup>          | 1              | 1     | Asia-Pacific | Thailand   | 26       | 28               | No         | 2000               | CQ3+PQ14                                       | 26                   | 26                      | 26.9       | 39 (-)      |                | No response from investigators        |
| Fryauff-2002 <sup>211</sup>            | 1              | 1     | Asia-Pacific | Indonesia  | 36       | 28               | No         | 1998               | CQ3                                            | 36                   | 36                      | 38.9       | 14 (-)      |                | No response from investigators        |
| Hamedi-2002 <sup>214</sup>             | 1              | 1     | Asia-Pacific | Iran       | 40       | 28               | No         | 1999-2001          | CQ3                                            | 40                   | 40                      | 12.5       | 27.2 (9.1)  |                | No response from investigators        |
| Maguire-2002 <sup>210</sup>            | 2              | 1     | Asia-Pacific | Indonesia  | 73       | 28               | No         | Not stated         | CQ3                                            | 73                   | 73                      | 62.5       | 32 (-)      |                | No response from investigators        |
| Mohapatra-2002 <sup>176</sup>          | 1              | 1     | Asia-Pacific | India      | 110      | 365              | No         | 1998-2000          | CQ3+PQ14                                       | 110                  | 110                     | 36.4       | Not stated  |                | Contact details not up to date        |
| Tjitra-2002 <sup>215</sup>             | 3              | 1     | Asia-Pacific | Indonesia  | 37       | 28               | Yes        | 1999               | CQ3; CQ3+SP; AS+SP                             | 37                   | 9                       | 33         | 8.8 (-)     |                | No response from investigators        |
| Yadav-2002 <sup>217</sup>              | 2              | 1     | Asia-Pacific | India      | 1482     | 365              | Yes        | 1988-1991          | CQ1; CQ1+PQ5                                   | 1482                 | 1482                    | Not stated | Not stated  |                | No response from investigators        |
| da Sliva-2003 <sup>177</sup>           | 8              | 1     | The Americas | Brazil     | 240      | 180              | Yes        | Not stated         | CQ1+PQ5; CQ1+PQ7; AS+PQ; AS+PQ; AS+PQ; AS+PQ   | 240                  | 60                      | 23.3       | 32.9 (-)    |                | Contact details not up to date        |
| Machado-2003 <sup>218</sup>            | 1              | 1     | The Americas | Brazil     | 30       | 28               | No         | Not stated         | CQ3+PQ14                                       | 30                   | 30                      | Not stated | Not stated  |                | No response from investigators        |
| Nandy-2003 <sup>178</sup>              | 1              | 2     | Asia-Pacific | India      | 800      | 28               | No         | 1998-2001          | CQ3                                            | 800                  | 800                     | Not stated | Not stated  |                | Contact details not up to date        |
| Pinto-2003 <sup>219</sup>              | 2              | 1     | The Americas | Brazil     | 132      | 28               | Yes        | 1997-1998          | CQ1+PQ14; CQ3+PQ14                             | 132                  | 132                     | 37.9       | 30.7 (-)    |                | No response from investigators        |
| Rajgor-2003 <sup>220</sup>             | 2              | 1     | Asia-Pacific | India      | 273      | 180              | Yes        | 1998-2000          | CQ3; CQ3+PQ14                                  | 273                  | 273                     | 12.1       | Not stated  |                | No response from investigators        |
| Ruebush-2003 <sup>179</sup>            | 1              | 2     | The Americas | Peru       | 242      | 28               | No         | 1998-2001          | CQ3                                            | 242                  | 242                     | 40.9       | 19 (-)      |                | Contact details not up to date        |
| Sumawinata-2003 <sup>221</sup>         | 1              | 1     | Asia-Pacific | Indonesia  | 29       | 28               | No         | 1995               | CQ3                                            | 29                   | 29                      | Not stated | Not stated  | 24 (5-40)      | No response from investigators        |
| Valibayov-2003 <sup>222</sup>          | 1              | 1     | Asia-Pacific | Azerbaijan | 153      | 28               | No         | Not stated         | CQ3+PQ14                                       | 153                  | 153                     | 42.5       | 30.8 (-)    |                | No response from investigators        |
| Hapuarachchi-2004 <sup>223</sup>       | 1              | 1     | Asia-Pacific | Sri Lanka  | 42       | 28               | No         | 2002               | CQ3                                            | 42                   | 42                      | 0          | Not stated  |                | No response from investigators        |
| Kurcer-2004 <sup>180</sup>             | 1              | 2     | Asia-Pacific | Turkey     | 112      | 28               | No         | 2002               | CQ3                                            | 112                  | 112                     | 51.4       | Not stated  |                | Contact details not up to date        |
| Leslie-2004 <sup>189</sup>             | 3              | 1     | Asia-Pacific | Pakistan   | 595      | 270              | Yes        | 2000               | CQ3; CQ3+PQ14; CQ3+PQ14                        | 595                  | 595                     | 50.7       | 12.9 (-)    |                | Missing minimum data                  |
| Vijaykadga-2004 <sup>224</sup>         | 1              | 3     | Asia-Pacific | Thailand   | 161      | 28               | No         | 2003               | CQ3+PQ14                                       | 161                  | 161                     | 19.3       | 32.3 (-)    |                | No response from investigators        |
| Walsh-2004 <sup>182</sup>              | 5              | 1     | Asia-Pacific | Thailand   | 80       | 168              | Yes        | 1998-1999          | CQ3+TQ7; CQ3+TQ3; CQ3+TQ1; CQ3; CQ3+PQ14       | 80                   | 25                      | 68         | Not stated  |                | Contact details not up to date        |

|                                      |   |   |              |                   |               |     |     |            |                            |               |               |               |               |             |                                       |
|--------------------------------------|---|---|--------------|-------------------|---------------|-----|-----|------------|----------------------------|---------------|---------------|---------------|---------------|-------------|---------------------------------------|
| Dunne-2005 <sup>183</sup>            | 2 | 2 | Asia-Pacific | India             | 96            | 28  | Yes | 1998-2001  | CQ3; Az; CQ3+Az            | 96            | 16            | 6             | 31.8 (-)      |             | Contact details not up to date        |
| Genton-2005 <sup>196</sup>           | 2 | 1 | Asia-Pacific | Papua New Guinea  | 18            | 28  | No  | 1994-1995  | CQ3; AQ; Qu+SP             | 18            | 5             | 52            | 5.1 (-)       |             | Initial response but no data provided |
| Alvarez-2006 <sup>190</sup>          | 3 | 2 | The Americas | Colombia          | 210           | 180 | Yes | 2001       | CQ3+PQ3; CQ3+PQ7; CQ3+PQ14 | 210           | 210           | 33            | 30.1 (12.8)   |             | Missing minimum data                  |
| Krudsood-2006 <sup>184</sup>         | 2 | 1 | Asia-Pacific | Thailand          | 141           | 28  | Yes | 2004-2005  | CQ3+PQ7; CQ3+BQ7           | 141           | 141           | 74.6          | 25.0 (6.7)    |             | Contact details not up to date        |
| Kurcer-2006 <sup>181</sup>           | 1 | 2 | Asia-Pacific | Turkey            | 91            | 28  | No  | 2004       | CQ3                        | 91            | 91            | 34.1          | Not stated    |             | Contact details not up to date        |
| Maguire-2006 <sup>225</sup>          | 2 | 1 | Asia-Pacific | Indonesia         | 243           | 28  | Yes | 1996-1999  | CQ3; Mfq                   | 243           | 122           | 35.2          | 22.6 (-)      |             | No response from investigators        |
| Tasanor-2006 <sup>226</sup>          | 2 | 1 | Asia-Pacific | Thailand          | 58            | 28  | Yes | 2002-2004  | CQ3+PQ14; Qu+PQ14          | 62            | 31            | 41.9          | Not stated    | 22          | No response from investigators        |
| de Santana Filho-2007 <sup>185</sup> | 1 | 1 | The Americas | Brazil            | 166           | 28  | No  | 2004-2005  | CQ3                        | 166           | 166           | Not stated    | Not stated    |             | Contact details not up to date        |
| Kolaczinski-2007 <sup>197</sup>      | 2 | 1 | Asia-Pacific | Afghanistan       | 190           | 42  | Yes | 2004       | CQ3; SP+AS                 | 190           | 96            | 43            | Not stated    | 8.5         | Initial response but no data provided |
| Krudsood-2007 <sup>227</sup>         | 2 | 1 | Asia-Pacific | Thailand          | 98            | 28  | Yes | 2004-2005  | CQ3; AL                    | 98            | 51            | 31.4          | 24.3 (6.3)    |             | No response from investigators        |
| Nateghpour-2007 <sup>228</sup>       | 1 | 4 | Asia-Pacific | Iran              | 225           | 28  | No  | 2004-2005  | CQ3                        | 225           | 225           | 25.6          | Not stated    |             | No response from investigators        |
| Osorio-2007 <sup>229</sup>           | 1 | 1 | The Americas | Colombia          | 22            | 28  | No  | 2002-2003  | CQ3                        | 22            | 22            | 50            | Not stated    |             | No response from investigators        |
| Barnadas-2008a <sup>198</sup>        | 1 | 3 | Africa       | Madagascar        | 105           | 28  | No  | 2006       | CQ3                        | 105           | 105           | 53            | 11.2 (-)      |             | Initial response but no data provided |
| Carmona-Fonseca-2008 <sup>191</sup>  | 1 | 2 | The Americas | Colombia          | 82            | 30  | Yes | 2004       | CQ3; CQ3                   | 82            | 82            | 62            | Not stated    |             | Missing minimum data                  |
| Perez-2008 <sup>230</sup>            | 1 | 1 | The Americas | Colombia          | 50            | 28  | No  | 2006       | CQ3                        | 50            | 50            | 42.4          | Not stated    |             | No response from investigators        |
| Srivastava-2008 <sup>231</sup>       | 1 | 2 | Asia-Pacific | India             | 138           | 28  | No  | 2003-2005  | CQ3                        | 138           | 138           | 47.1          | Not stated    |             | No response from investigators        |
| Teka-2008 <sup>199</sup>             | 1 | 1 | Africa       | Ethiopia          | 87            | 28  | No  | 2006       | CQ3                        | 87            | 87            | 41.4          | Not stated    | 16 (0.7-52) | Initial response but no data provided |
| Carmona-Fonseca-2009 <sup>169</sup>  | 4 | 2 | The Americas | Colombia          | 188           | 120 | Yes | 2001-2003  | CQ3+PQ14; CQ3+PQ3; CQ3+PQ3 | 188           | 188           | 30.4          | Not stated    |             | Data not available                    |
| Lee-2009b <sup>186</sup>             | 1 | 1 | Asia-Pacific | Republic of Korea | 142           | 28  | No  | 2007       | CQ3+PQ14                   | 142           | 142           | 0             | Not stated    | 21 (19-50)  | Contact details not up to date        |
| Liang-2009 <sup>187</sup>            | 2 | 1 | Asia-Pacific | Myanmar           | 48            | 28  | Yes | Not stated | CQ3; CQ3                   | 48            | 48            | Not stated    | Not stated    |             | Contact details not up to date        |
| Nateghpour-2009 <sup>232</sup>       | 1 | 1 | Asia-Pacific | Iran              | Not available | 28  | No  | Not stated | CQ3                        | Not available | Not available | Not available | Not available |             | No response from investigators        |
| Orjuela-Sanchez-2009 <sup>192</sup>  | 2 | 1 | The Americas | Brazil            | 164           | 336 | No  | 2004-2007  | CQ3+PQ7; CQ3+PQ7           | 164           | 164           | Not stated    | Not stated    |             | Missing minimum data                  |
| Rogers-2009 <sup>188</sup>           | 1 | 1 | Asia-Pacific | Cambodia          | 110           | 42  | No  | 2006-2008  | CQ3                        | 110           | 110           | 11            | 21.2 (6.7)    |             | Contact details not up to date        |
| Carmona-Fonseca-2010 <sup>168</sup>  | 2 | 1 | The Americas | Colombia          | 79            | 120 | Yes | 2005-2008  | CQ3+PQ3; CQ3+PQ7           | 79            | 79            | Not stated    | Not stated    |             | Data not available                    |
| Daneshvar-2010 <sup>193</sup>        | 1 | 1 | Asia-Pacific | Malaysia          | 23            | 28  | No  | -2007      | CQ3+PQ14                   | 23            | 23            | 0             | 38.5 (7.6)    |             | Missing minimum data                  |
| Dilmec-2010 <sup>233</sup>           | 1 | 1 | Asia-Pacific | Turkey            | 42            | 28  | No  | Not stated | CQ3                        | 42            | 42            | 47.2          | Not stated    |             | No response from investigators        |
| Kinzer-2010 <sup>234</sup>           | 1 | 1 | Asia-Pacific | Vanuatu           | 21            | 28  | No  | 2005       | CQ3                        | 21            | 21            | 66.7          | Not stated    | 11 (5-53)   | No response from investigators        |
| Takeuchi-2010 <sup>235</sup>         | 2 | 1 | Asia-Pacific | Thailand          | 216           | 90  | Yes | 2007-2009  | CQ3+PQ14; CQ3+PQ14         | 216           | 216           | 39.8          | Not stated    |             | No response from investigators        |
| Yeshiwondim-2010 <sup>236</sup>      | 2 | 2 | Africa       | Ethiopia          | 290           | 28  | Yes | 2003       | CQ3; CQ3+PQ14              | 290           | 290           | 45.9          | 23 (12.0)     |             | No response from investigators        |
| Asih-2011 <sup>237</sup>             | 1 | 1 | Asia-Pacific | Indonesia         | 73            | 28  | No  | 2007       | CQ3                        | 73            | 73            | 50.7          | Not stated    | 13.2 (2-60) | No response from investigators        |
| Congpuong-2011 <sup>238</sup>        | 1 | 4 | Asia-Pacific | Thailand          | 212           | 28  | No  | 2009-2010  | CQ3                        | 212           | 212           | 27.8          | Not stated    | 25 (2-80)   | No response from investigators        |
| Ketema-2011 <sup>200</sup>           | 1 | 1 | Africa       | Ethiopia          | 87            | 28  | No  | 2009       | CQ3                        | 87            | 87            | 57.4          | Not stated    | 8 (9m-52)   | Initial response but no data provided |
| Maneeboonyang-2011 <sup>239</sup>    | 2 | 1 | Asia-Pacific | Thailand          | 92            | 90  | Yes | 2005-2006  | CQ3+PQ14; CQ3+PQ14         | 92            | 92            | 40            | Not stated    |             | No response from investigators        |
| Muhamad-2011 <sup>240</sup>          | 1 | 1 | Asia-Pacific | Thailand          | 130           | 42  | No  | 2008-2009  | CQ3+PQ14                   | 130           | 130           | 50.8          | Not stated    | 22          | No response from investigators        |
| Van Den Eede-2011 <sup>241</sup>     | 1 | 1 | The Americas | Peru              | 51            | 365 | No  | 2008       | CQ3+PQ7                    | 51            | 51            | 49            | Not stated    | 15 (2-80)   | No response from investigators        |

|                                        |   |   |              |            |      |     |     |            |                                               |      |      |            |             |               |                                       |
|----------------------------------------|---|---|--------------|------------|------|-----|-----|------------|-----------------------------------------------|------|------|------------|-------------|---------------|---------------------------------------|
| Yohannes-2011 <sup>242</sup>           | 2 | 2 | Africa       | Ethiopia   | 159  | 28  | No  | 2004-2005  | CQ3; AL                                       | 159  | 71   | 52.1       | Not stated  | 19 (10-26)    | No response from investigators        |
| Anez-2012 <sup>201</sup>               | 1 | 3 | The Americas | Bolivia    | 223  | 28  | No  | 2006-2007  | CQ3                                           | 223  | 223  | 42.2       | Not stated  |               | Initial response but no data provided |
| Graf-2012 <sup>243</sup>               | 3 | 1 | The Americas | Peru       | 540  | 210 | Yes | 2005-2008  | CQ3+PQ5; CQ3+PQ7; CQ3+PQ14                    | 540  | 540  | Not stated | Not stated  |               | No response from investigators        |
| Pedro-2012 <sup>244</sup>              | 1 | 1 | The Americas | Brazil     | 47   | 28  | No  | 2005-2011  | CQ3+PQ                                        | 47   | 47   | 24.5       | Not stated  |               | No response from investigators        |
| Saravu-2012 <sup>170</sup>             | 1 | 1 | Asia-Pacific | India      | 110  | 28  | No  | 2007-2009  | CQ3+PQ14                                      | 110  | 110  | 26.3       | Not stated  | 28.5          | Data not available                    |
| Ganguly-2013 <sup>245</sup>            | 2 | 1 | Asia-Pacific | India      | 250  | 42  | Yes | 2011-2012  | CQ3; CQ3+PQ14                                 | 250  | 250  | 10.8       | 25.2 (-)    |               | No response from investigators        |
| Leang-2013 <sup>246</sup>              | 1 | 4 | Asia-Pacific | Cambodia   | 390  | 28  | No  | 2008-2011  | CQ3; DP                                       | 390  | 217  | 29         | 18.8 (-)    |               | No response from investigators        |
| Liu-2013 <sup>247</sup>                | 2 | 1 | Asia-Pacific | China      | 255  | 365 | Yes | 2009-2010  | CQ3+PQ8; ART+NQ                               | 260  | 132  | 14         | Not stated  |               | No response from investigators        |
| Macareo-2013 <sup>248</sup>            | 2 | 1 | Asia-Pacific | Thailand   | 20   | 90  | Yes | Not stated | CQ5+PQ14; CQ5+TND                             | 20   | 6    | Not stated | Not stated  |               | No response from investigators        |
| Manandhar-2013 <sup>194</sup>          | 1 | 4 | Asia-Pacific | Nepal      | 137  | 180 | No  | 2010-2011  | CQ3                                           | 137  | 137  | 19         | Not stated  |               | Missing minimum data                  |
| Miahipour-2013 <sup>249</sup>          | 2 | 2 | Asia-Pacific | Iran       | 180  | 540 | No  | 2008-2011  | CQ3; CQ3+PQ8w                                 | 163  | 163  | 23.3       | Not stated  |               | No response from investigators        |
| Rios-2013 <sup>250</sup>               | 1 | 1 | The Americas | Colombia   | 152  | 28  | No  | 2002-2011  | CQ3                                           | 152  | 152  | 39.5       | 38 (-)      |               | No response from investigators        |
| Zhu-2013 <sup>251</sup>                | 1 | 1 | Asia-Pacific | China      | 39   | 28  | No  | 2008-2009  | CQ3+PQ8                                       | 39   | 39   | 42.1       | 43 (-)      |               | No response from investigators        |
| Amaratunga-2014 <sup>252</sup>         | 1 | 1 | Asia-Pacific | Cambodia   | 87   | 28  | No  | 2012-2013  | CQ3                                           | 87   | 87   | 20.7       | Not stated  | 26 (4-68)     | No response from investigators        |
| Delgado-Ratto-2014 <sup>253</sup>      | 1 | 1 | The Americas | Peru       | 37   | 720 | No  | 2008       | CQ3+PQ7                                       | 37   | 37   | 48.6       | Not stated  | 15            | No response from investigators        |
| Liu-2014 <sup>254</sup>                | 1 | 1 | Asia-Pacific | China      | 750  | 28  | No  | 2008-2013  | CQ3                                           | 750  | 750  | 41.5       | 25.2 (6.8)  |               | No response from investigators        |
| Llanos-Cuentas-2014 <sup>171</sup>     | 6 | 4 | Multicentred | Brazil     | 329  | 180 | Yes | 2011-2013  | CQ3; CQ3+PQ14; CQ3+TQ; CQ3+TQ; CQ3+TQ; CQ3+TQ | 329  | 104  | 28.8       | 34.8 (-)    |               | Data not available                    |
| Rajgor-2014 <sup>255</sup>             |   | 1 | Asia-Pacific | India      | 1556 | 180 | Yes | Not stated | CQ3; CQ3+PQ7; CQ3+PQ14; CQ3+PQ14              | 1556 | 1556 | 4.8        | 31.2 (-)    |               | No response from investigators        |
| Shalini-2014 <sup>195</sup>            | 1 | 1 | Asia-Pacific | India      | 125  | 28  | No  | 2010       | CQ3                                           | 125  | 125  | 5          | 25.9 (10.5) |               | Missing minimum data                  |
| Ould Ahmedou Salem-2015 <sup>256</sup> | 1 | 2 | Africa       | Mauritania | 128  | 28  | No  | 2013       | CQ3                                           | 128  | 128  | 53.1       | 27.2 (-)    |               | No response from investigators        |
| Assefa-2015 <sup>257</sup>             | 1 | 1 | Africa       | Ethiopia   | 63   | 28  | No  | 2014       | CQ3                                           | 63   | 63   | 41.7       | Not stated  | 23 (4-59)     | No response from investigators        |
| Cheoymang-2015 <sup>258</sup>          | 1 | 1 | Asia-Pacific | Thailand   | 85   | 42  | No  | 2008-2009  | CQ3+PQ14                                      | 85   | 85   | 34.1       | Not stated  |               | No response from investigators        |
| Pareek-2015 <sup>259</sup>             | 3 | 8 | Asia-Pacific | India      | 358  | 180 | Yes | Not stated | CQ3+PQ7; CQ3+PQ14; CQ3+PQ14                   | 358  | 358  | 17.3       | Not stated  | 20            | No response from investigators        |
| Yuan-2015 <sup>260</sup>               | 1 | 1 | Asia-Pacific | Myanmar    | 587  | 42  | No  | 2012-2013  | CQ3+PQ8                                       | 587  | 587  | 46.85      | Not stated  | 9 (1-77)      | No response from investigators        |
| Beyene-2016 <sup>261</sup>             | 1 | 1 | Africa       | Ethiopia   | 76   | 28  | No  | 2014       | CQ3                                           | 76   | 76   | 32         | Not stated  | 19 (3-54)     | No response from investigators        |
| Lo-2016 <sup>262</sup>                 | 1 | 1 | Asia-Pacific | Myanmar    | 130  | 90  | No  | 2011-2013  | CQ3                                           | 130  | 130  | Not stated | Not stated  |               | No response from investigators        |
| Longley-2016 <sup>263</sup>            | 1 | 1 | Asia-Pacific | Thailand   | 57   | 270 | No  | 2014-2015  | CQ3+PQ14                                      | 57   | 57   | 37         | Not stated  | 22 (7-71)     | No response from investigators        |
| Mishra-2016 <sup>172</sup>             | 1 | 5 | Asia-Pacific | India      | 401  | 42  | No  | 2011-2012  | CQ3                                           | 401  | 401  | 17.5       | Not stated  |               | Data not available                    |
| Negreiros-2016 <sup>264</sup>          | 1 | 1 | The Americas | Brazil     | 119  | 168 | No  | 2014       | CQ3+PQ7                                       | 119  | 119  | 45.4       | Not stated  | 23.4 (5-67.3) | No response from investigators        |
| Valecha-2016 <sup>173</sup>            | 2 | 9 | Asia-Pacific | India      | 317  | 42  | Yes | 2011-2013  | CQ3+PQ14; ATM+PIP+PQ14                        | 317  | 158  | 8.2        | 33.7 (13.5) |               | Data not available                    |
| Waqar-2016 <sup>265</sup>              | 1 | 1 | Asia-Pacific | Pakistan   | 52   | 28  | No  | 2013       | CQ3                                           | 52   | 52   | Not stated | 5.4 (3.4)   |               | No response from investigators        |
| Seifu-2017 <sup>266</sup>              | 1 | 1 | Africa       | Ethiopia   | 87   | 28  | No  | 2013       | CQ3                                           | 87   | 87   | 29.7       | Not stated  | 20 (1-65)     | No response from investigators        |

Pv – *P. vivax*; SD – standard deviation; CQ – chloroquine; PQ – primaquine; Qu – Quinine; Mfq – mefloquine; Halo – halofantrine; AS – artesunate; Am - artemether; SP – sulfadoxine-pyrimethamine; BQ – bulaquine; TQ – tafenoquine; Az – azithromycin; AL – artemether-lumefantrine; DP – dihydroartemisinin-piperaquine; ART - artemisinin; NQ - naphthoquine; TND – tinidazole; PQ8w – primaquine weekly for 8 weeks; ATM – arterolane maleate; PIP – piperaquine;

\*Treatment arms in study described as drug and number of days given if CQ+/-PQ.

**Table S5. Comparison of baseline characteristics between included and targeted studies**

| Characteristic                 | Included studies<br>(n=37) | Targeted studies*<br>(n=101)   |
|--------------------------------|----------------------------|--------------------------------|
| Region                         |                            |                                |
| Asia-Pacific, studies (%)      | 26 (70.3%)                 | 64 (63.4%)                     |
| Africa, studies (%)            | 4 (10.8%)                  | 9 (8.9%)                       |
| The Americas, studies (%)      | 7 (18.9%)                  | 28 (27.7%)                     |
| Year of enrolment <sup>†</sup> |                            |                                |
| Pre-2009, studies (%)          | 15 (40.5%)                 | 66 (74.2%) <sup>‡</sup>        |
| 2009-2017, studies (%)         | 22 (59.5%)                 | 23 (25.8%) <sup>‡</sup>        |
| Age, median (IQR)              | 20.0 (10.0, 31.0)          | 25.9 (24.3, 31.2) <sup>§</sup> |
| Female, % of patients          | 34.1%                      | 35.2% <sup>¶</sup>             |

\* Age and female percentage of targeted studies frequency weighted according to number of patients treated with CQ alone or CQ and PQ; <sup>†</sup>Year of enrolment defined as the year study enrolment completed; <sup>‡</sup>Year of enrolment not available from 12 studies; <sup>§</sup>Mean age not available from 59 studies; <sup>¶</sup>Percentage based on frequency weighted median of targeted studies, percentage not available from 17 studies

**Table S6A. Total doses of chloroquine by baseline characteristic in patients receiving chloroquine alone**

|                     | Chloroquine dose, mg/kg |                   |              | CQ dose <25 mg/kg |
|---------------------|-------------------------|-------------------|--------------|-------------------|
|                     | Number                  | Median (IQR)      | Range        | Number (%)        |
| Overall             | 2990                    | 25.4 (24.2, 28.1) | (6.8, 75.0)  | 1041 (34.8%)      |
| Gender              |                         |                   |              |                   |
| Female              | 1104                    | 25.9 (24.6, 28.3) | (12.5, 62.5) | 307 (27.8%)       |
| Male                | 1886                    | 25.0 (23.8, 28.1) | (6.8, 75.0)  | 734 (38.9%)       |
| Age category, years |                         |                   |              |                   |
| <5                  | 359                     | 26.8 (25.0, 28.8) | (6.8, 47.7)  | 50 (13.9%)        |
| 5 to <15            | 916                     | 26.5 (25.0, 30.0) | (17.5, 75.0) | 143 (15.6%)       |
| ≥15                 | 1715                    | 25.0 (23.1, 27.1) | (9.4, 44.1)  | 848 (49.4%)       |
| Weight category, kg |                         |                   |              |                   |
| 5 to <15            | 342                     | 26.8 (25.0, 28.8) | (6.8, 75.0)  | 54 (15.8%)        |
| 15 to <25           | 574                     | 26.6 (25.0, 30.0) | (17.5, 52.9) | 71 (12.4%)        |
| 25 to <35           | 235                     | 26.5 (25.0, 31.0) | (19.5, 46.2) | 40 (17.0%)        |
| 35 to <45           | 320                     | 26.4 (25.0, 30.0) | (18.8, 42.9) | 82 (25.6%)        |
| 45 to <55           | 649                     | 25.5 (24.5, 28.8) | (12.5, 36.0) | 234 (36.1%)       |
| 55 to <80           | 777                     | 24.2 (21.7, 25.0) | (9.4, 32.7)  | 475 (61.1%)       |
| ≥80                 | 93                      | 17.6 (16.3, 18.5) | (13.5, 25.2) | 85 (91.4%)        |
| Relapse Periodicity |                         |                   |              |                   |
| Long                | 1914                    | 26.0 (23.4, 30.0) | (6.8, 75.0)  | 606 (31.7%)       |
| Short               | 1076                    | 25.0 (24.3, 26.2) | (17.4, 43.5) | 435 (40.4%)       |
| Geographical region |                         |                   |              |                   |
| Asia-Pacific        | 2112                    | 25.5 (24.3, 27.8) | (6.8, 75.0)  | 713 (33.8%)       |
| The Americas        | 289                     | 23.8 (19.6, 25.0) | (13.5, 36.0) | 165 (57.1%)       |
| Africa              | 589                     | 27.3 (24.2, 30.8) | (16.4, 62.5) | 163 (27.7%)       |

IQR = Interquartile range

**Table S6B. Total doses of chloroquine and primaquine by baseline characteristic in patients receiving chloroquine and early primaquine**

|                     | Chloroquine dose, mg/kg |                   |              | Chloroquine dose <25 mg/kg | Primaquine dose, mg/kg |                |             |
|---------------------|-------------------------|-------------------|--------------|----------------------------|------------------------|----------------|-------------|
|                     | Number                  | Median (IQR)      | Range        | Number (%)                 | Number                 | Median (IQR)   | Range       |
| Overall             | 1790                    | 25.0 (23.3, 27.3) | (12.6, 75.0) | 830 (46.4%)                | 1789                   | 4.7 (3.4, 6.7) | (0.3, 13.1) |
| Gender              |                         |                   |              |                            |                        |                |             |
| Female              | 571                     | 25.4 (24.3, 28.6) | (13.6, 52.2) | 224 (39.2%)                | 570                    | 4.9 (3.8, 6.8) | (0.4, 9.1)  |
| Male                | 1219                    | 25.0 (22.7, 26.8) | (12.6, 75.0) | 606 (49.7%)                | 1219                   | 4.3 (3.3, 6.7) | (0.3, 13.1) |
| Age category, years |                         |                   |              |                            |                        |                |             |
| <5                  | 88                      | 27.2 (25.0, 31.2) | (18.8, 45.0) | 21 (23.9%)                 | 87                     | 5.1 (4.7, 6.9) | (2.6, 10.5) |
| 5 to <15            | 413                     | 26.1 (24.8, 30.0) | (13.8, 75.0) | 111 (26.9%)                | 413                    | 5.3 (4.5, 7.0) | (0.3, 13.1) |
| ≥15                 | 1289                    | 24.8 (22.2, 26.3) | (12.6, 44.4) | 698 (54.2%)                | 1289                   | 4.0 (3.2, 6.6) | (0.3, 10.5) |
| Weight category, kg |                         |                   |              |                            |                        |                |             |
| 5 to <15            | 101                     | 28.8 (25.9, 32.6) | (18.8, 75.0) | 20 (19.8%)                 | 100                    | 5.1 (4.6, 6.9) | (2.6, 13.1) |
| 15 to <25           | 208                     | 26.1 (25.0, 30.0) | (20.8, 52.2) | 41 (19.7%)                 | 208                    | 5.1 (4.7, 6.6) | (1.4, 9.1)  |
| 25 to <35           | 120                     | 26.8 (25.0, 32.1) | (20.7, 44.4) | 30 (25.0%)                 | 120                    | 6.2 (4.5, 7.2) | (2.2, 8.4)  |
| 35 to <45           | 185                     | 25.7 (24.7, 30.0) | (21.1, 38.8) | 71 (38.4%)                 | 185                    | 5.2 (4.8, 7.2) | (2.0, 10.5) |
| 45 to <55           | 413                     | 25.6 (24.8, 28.9) | (13.9, 34.4) | 126 (30.5%)                | 413                    | 5.0 (4.2, 6.9) | (0.3, 8.9)  |
| 55 to <80           | 656                     | 24.2 (21.4, 25.2) | (13.8, 33.2) | 435 (66.3%)                | 656                    | 3.5 (3.1, 4.0) | (0.3, 8.0)  |
| ≥80                 | 107                     | 17.5 (16.3, 18.3) | (12.6, 24.5) | 107 (100.0%)               | 107                    | 2.8 (2.5, 3.0) | (1.8, 7.5)  |
| Relapse Periodicity |                         |                   |              |                            |                        |                |             |
| Long                | 902                     | 23.4 (20.5, 27.3) | (12.6, 75.0) | 535 (59.3%)                | 902                    | 3.4 (3.0, 4.0) | (0.3, 13.1) |
| Short               | 888                     | 25.4 (24.7, 27.7) | (15.4, 45.0) | 295 (33.2%)                | 887                    | 6.7 (5.0, 7.1) | (0.4, 12.1) |
| Geographical region |                         |                   |              |                            |                        |                |             |
| Asia-Pacific        | 1203                    | 25.4 (24.6, 28.3) | (12.9, 75.0) | 428 (35.6%)                | 1202                   | 5.7 (4.4, 7.0) | (0.4, 13.1) |
| The Americas        | 487                     | 23.1 (19.9, 26.0) | (12.6, 45.0) | 321 (65.9%)                | 487                    | 3.3 (3.0, 3.8) | (2.0, 7.0)  |
| Africa              | 100                     | 22.7 (21.5, 24.0) | (17.9, 30.0) | 81 (81.0%)                 | 100                    | 3.5 (2.6, 4.0) | (0.3, 5.2)  |

IQR = Interquartile range



**Table S7. Risk factors for vomiting in patients treated with chloroquine alone**

|                                                                       | Univariate analysis |                     |         | Multivariate analysis        |         |
|-----------------------------------------------------------------------|---------------------|---------------------|---------|------------------------------|---------|
|                                                                       | Number vomited (%)  | Odds Ratio (95% CI) | p value | Adjusted Odds Ratio (95% CI) | p value |
| Chloroquine dose, every mg/kg increase                                | 20/557 (3.6%)       | 1.19 (1.02, 1.39)   | 0.0292  | 1.14 (0.96, 1.34)            | 0.1270  |
| Age, per every 1 year increase                                        | 20/557 (3.6%)       | 0.92 (0.86, 0.98)   | 0.0137  | 0.92 (0.86, 0.98)            | 0.0142  |
| Gender                                                                |                     |                     |         |                              |         |
| Male                                                                  | 14/369 (3.8%)       | Reference           | ..      | Reference                    | ..      |
| Female                                                                | 6/188 (3.2%)        | 0.84 (0.31, 2.27)   | 0.7247  | 0.59 (0.21, 1.66)            | 0.3147  |
| Baseline parasitaemia, parasites per $\mu$ L every ten-times increase | 20/557 (3.6%)       | 1.18 (0.49, 2.85)   | 0.7106  | 1.00 (0.51, 1.96)            | 0.9912  |
| Presence of fever at baseline*                                        |                     |                     |         |                              |         |
| No                                                                    | 11/343 (3.2%)       | Reference           | ..      | Reference                    | ..      |
| Yes                                                                   | 9/201 (4.5%)        | 1.41 (0.56, 3.54)   | 0.4588  | 1.52 (0.69, 3.35)            | 0.2942  |
| Relapse periodicity                                                   |                     |                     |         |                              |         |
| Long                                                                  | 11/297 (3.7%)       | Ref                 | ..      | Ref                          | ..      |
| Short                                                                 | 9/260 (3.5%)        | 0.93 (0.20, 4.28)   | 0.9281  | 0.58 (0.15, 2.18)            | 0.4172  |

CI = Confidence Interval: \*Presence of fever at baseline was only available for 544 of 557 patients

**Table S8: Multivariable models for rate of *P. vivax* recurrence between day 7 and 42 in patients receiving chloroquine alone aged less than five years, five to less than 15 years or greater than or equal to 15 years**

|                                                         | Age 0 to <5 years |                      |         | Age 5 to <15 years |                      |         | Age ≥15 years |                       |         |
|---------------------------------------------------------|-------------------|----------------------|---------|--------------------|----------------------|---------|---------------|-----------------------|---------|
|                                                         | Total N (n)*      | Adjusted HR (95% CI) | p value | Total N (n)*       | Adjusted HR (95% CI) | p value | Total N (n)*  | Adjusted HR (95% CI)  | p value |
| Chloroquine dose, every 5 mg/kg increase                | 359 (100)         | 0.59 (0.41, 0.86)    | 0.0058  | 916 (182)          | 0.83 (0.62, 1.11)    | 0.2098  | 1715 (223)    | 0.99 (0.76, 1.30)     | 0.9547  |
| Age, per every 1 year increase                          | 359 (100)         | 0.89 (0.73, 1.08)    | 0.2234  | 916 (182)          | 0.96 (0.91, 1.01)    | 0.1549  | 1715 (223)    | 0.97 (0.95, 0.98)     | <0.0001 |
| Gender                                                  |                   |                      |         |                    |                      |         |               |                       |         |
| Male                                                    | 202 (52)          | Reference            | ..      | 484 (97)           | Reference            | ..      | 1200 (167)    | Reference             | ..      |
| Female                                                  | 157 (48)          | 1.09 (0.73, 1.64)    | 0.6690  | 432 (85)           | 1.14 (0.84, 1.54)    | 0.4091  | 515 (56)      | 0.77 (0.56, 1.05)     | 0.1006  |
| Parasitaemia, parasites per µL every ten-times increase | 359 (100)         | 1.13 (0.77, 1.63)    | 0.5364  | 916 (182)          | 1.32 (0.98, 1.79)    | 0.0675  | 1715 (223)    | 1.23 (0.97, 1.56)     | 0.0892  |
| Relapse periodicity                                     |                   |                      |         |                    |                      |         |               |                       |         |
| Long                                                    | 197 (28)          | Reference            | ..      | 630 (52)           | Reference            | ..      | 1087 (64)     | Reference             | ..      |
| Short                                                   | 162 (72)          | 6.98 (2.73, 17.83)   | <0.0001 | 286 (130)          | 15.10 (5.23, 43.57)  | <0.0001 | 628 (159)     | 34.67 (10.72, 112.07) | <0.0001 |

HR – hazard ratio. CI = Confidence Interval \*Number of patients (number with recurrence by day 42). The assumption of proportional hazards held for age less than five years ( $p=0.88$ ) and age five to less than 15 years ( $p=0.09$ ) but not age greater than or equal to 15 years ( $p=0.02$ ) according to the global test. Although the global test held for age five to less than 15 years the test for chloroquine dose did not ( $p=0.02$ ). For models of age five to less than 15 years and age greater than or equal to 15 years the AHR of chloroquine dose varied with time with a higher hazard ratio in the early follow up to day 21 when recrudescence is more likely (AHR 1.14, 95%CI 0.79-1.63,  $p=0.4929$  and AHR 1.30, 95%CI 0.91-1.87,  $p=0.1547$ , respectively) compared to later follow up after day 21 (AHR 0.66, 95%CI 0.45-0.96,  $p=0.030$  and AHR 0.83, 95%CI 0.61-1.15,  $p=0.266$ , respectively). To examine the robustness of the parameter estimates, a sensitivity analysis was carried out by removing one study site at a time which showed that the overall coefficient of variation of parameter estimates in the multivariable models was small (all CV <10%; Table S17-19).

**Table S9: Risk factors for patent parasitaemia on day 1 in patients receiving chloroquine alone**

|                                                                  | Total N (n)* | Univariable analysis |         | Multivariable analysis |         |
|------------------------------------------------------------------|--------------|----------------------|---------|------------------------|---------|
|                                                                  |              | Crude OR (95% CI)    | p value | Adjusted OR (95% CI)   | p value |
| Chloroquine total dose <25 mg/kg                                 |              |                      |         |                        |         |
| Yes                                                              | 874 (583)    | 2.09 (1.24, 3.51)    | 0.0056  | 1.65 (0.98, 2.78)      | 0.0595  |
| No                                                               | 1196 (586)   | Ref                  | ..      | Ref                    | ..      |
| Age category, years                                              |              |                      |         |                        |         |
| ≥15                                                              | 1219 (777)   | Ref                  | ..      | Ref                    | ..      |
| <5                                                               | 226 (120)    | 0.64 (0.33, 1.26)    | 0.1992  | 0.78 (0.40, 1.52)      | 0.4591  |
| 5 to <15                                                         | 625 (272)    | 0.44 (0.26, 0.75)    | 0.0023  | 0.55 (0.34, 0.89)      | 0.0152  |
| Gender                                                           |              |                      |         |                        |         |
| Male                                                             | 1304 (782)   | Ref                  | ..      | Ref                    | ..      |
| Female                                                           | 766 (387)    | 0.68 (0.50, 0.93)    | 0.0142  | 0.82 (0.61, 1.10)      | 0.1793  |
| Baseline parasitaemia, parasites per µL every ten times increase | 2070 (1169)  | 2.35 (1.25, 4.42)    | 0.0079  | 2.36 (1.31, 4.26)      | 0.0042  |
| Relapse periodicity                                              |              |                      |         |                        |         |
| Long                                                             | 1385 (735)   | Ref                  | ..      | Ref                    | ..      |
| Short                                                            | 685 (434)    | 1.53 (0.55, 4.28)    | 0.4188  | 1.20 (0.40, 3.56)      | 0.7473  |

OR – odds ratio; CI = Confidence Interval \*Number of patients (number with positive parasitaemia). Multivariable analysis. Chloroquine was categorised as the relationship between chloroquine dose and the log odds of parasite positivity was not linear.

**Table S10. Multivariable model evaluating the relationship between day of parasite clearance and rate of *P. vivax* recurrence between day 7 and 28 in patients receiving chloroquine alone**

|                                                              | Total N (n)* | AHR (95% CI)        | p value |
|--------------------------------------------------------------|--------------|---------------------|---------|
| Day parasites cleared                                        |              |                     |         |
| Day 1                                                        | 893 (33)     | Ref                 | ..      |
| Day 2                                                        | 748 (52)     | 1.38 (0.86, 2.20)   | 0.1796  |
| Day 3 or after                                               | 510 (84)     | 3.57 (2.09, 6.11)   | <0.0001 |
| Chloroquine dose, every 5 mg/kg increase                     | 2151 (169)   | 0.88 (0.69, 1.12)   | 0.3150  |
| Age, per every 1 year increase                               | 2151 (169)   | 0.96 (0.95, 0.98)   | <0.0001 |
| Gender                                                       |              |                     |         |
| Male                                                         | 1352 (114)   | Ref                 | ..      |
| Female                                                       | 799 (55)     | 0.96 (0.68, 1.35)   | 0.8102  |
| Parasitaemia, parasites per $\mu$ L every ten-times increase | 2151 (169)   | 1.17 (0.87, 1.57)   | 0.2871  |
| Relapse periodicity                                          |              |                     |         |
| Long                                                         | 1440 (45)    | Ref                 | ..      |
| Short                                                        | 711 (124)    | 16.99 (6.38, 45.26) | <0.0001 |

AHR – adjusted hazard ratio; CI = Confidence Interval; \*Number of patients (number with positive parasitaemia). The assumption of proportional hazards did not hold for the model ( $p < 0.0001$  according to the global test), with  $p < 0.0001$  for chloroquine dose. Similar to the overall model for chloroquine alone, there was an interaction between age and chloroquine dose, and a time varying hazard for patients aged five to less than 15 years or greater than or equal to 15 years. For models of age five to less than 15 years and age greater than or equal to 15 years the AHR of chloroquine dose varied with time with a higher hazard ratio in the early follow up to day 21 when recrudescence is more likely (AHR 1.46, 95% CI 1.01-2.11,  $p = 0.0452$  and AHR 1.26, 95% CI 0.85-1.88,  $p = 0.2484$ , respectively) compared to later follow up after day 21 (AHR 0.59, 95% CI 0.31-1.10,  $p = 0.098$  and AHR 0.79, 95% CI 0.46-1.35,  $p = 0.390$ , respectively).

**Table S11. Planned primaquine regimens in patients receiving chloroquine and early primaquine**

| <b>Total planned dose<br/>(mg/kg)</b> | <b>Number of days<br/>of regimen</b> | <b>Number (%)<br/>(n=1,790)</b> |
|---------------------------------------|--------------------------------------|---------------------------------|
| 3.5                                   | 7- 9                                 | 314 (17.5%)                     |
| 3.5                                   | 14                                   | 603 (33.7%)                     |
| 5.0                                   | 10                                   | 260 (14.5%)                     |
| 7                                     | 7                                    | 170 (9.5%)                      |
| 7                                     | 14                                   | 443 (24.8%)                     |

**Table S12. Multivariable model for rate of *P. vivax* recurrence between day 7 and 42 in patients receiving chloroquine alone or chloroquine and early primaquine**

|                                                              | Total N (n)* | Adjusted HR (95% CI) | p value |
|--------------------------------------------------------------|--------------|----------------------|---------|
| Primaquine                                                   |              |                      |         |
| No                                                           | 2990 (505)   | Ref                  | ..      |
| Yes                                                          | 1790 (31)    | 0.10 (0.05, 0.17)    | <0.0001 |
| Chloroquine dose, every 5 mg/kg increase                     | 4780 (536)   | 0.79 (0.67, 0.93)    | 0.0042  |
| Age, per every 1 year increase                               | 4780 (536)   | 0.97 (0.96, 0.97)    | <0.0001 |
| Gender                                                       |              |                      |         |
| Male                                                         | 3105 (340)   | Ref                  | ..      |
| Female                                                       | 1675 (196)   | 0.93 (0.78, 1.12)    | 0.4661  |
| Parasitaemia, parasites per $\mu$ L every ten-times increase | 4780 (536)   | 1.28 (1.09, 1.50)    | 0.0022  |
| Relapse periodicity                                          |              |                      |         |
| Long                                                         | 2816 (155)   | Ref                  | ..      |
| Short                                                        | 1964 (381)   | 13.63 (5.54, 33.56)  | <0.0001 |

HR – hazard ratio. CI = Confidence Interval \*Number of patients (number with recrudescence by day 42). The assumption of proportional hazards held for the model ( $p=0.06$  according to the global test), although  $p=0.002$  for chloroquine dose. Similar to the overall model for chloroquine alone, there was an interaction between age and chloroquine dose, and a time varying hazard for patients aged five to less than 15 years or greater than or equal to 15 years. For models of age five to less than 15 years and age greater than or equal to 15 years the AHR of chloroquine dose varied with time with a higher hazard ratio in the early follow up to day 21 when recrudescence is more likely (AHR 1.11, 95% CI 0.77-1.59,  $p=0.5817$  and AHR 1.42, 95% CI 1.02-1.97,  $p=0.0378$ , respectively) compared to later follow up after day 21 (AHR 0.69, 95% CI 0.48-0.98,  $p=0.040$  and AHR 0.80, 95% CI 0.59-1.07,  $p=0.127$ , respectively). To examine the robustness of the parameter estimates, a sensitivity analysis was carried out by removing one study site at a time which showed that the overall coefficient of variation of parameter estimates in the multivariable model was small (all CV <7%; Table S20).

**Table S13. Rate of *P. vivax* recurrence between day 7 and 42 in the subgroup of patients receiving chloroquine and early primaquine**

|                                                              | <b>Total N (n)*</b> | <b>Adjusted HR (95% CI)</b> | <b>p value</b> |
|--------------------------------------------------------------|---------------------|-----------------------------|----------------|
| Primaquine total dose <7 mg/kg <sup>†</sup>                  |                     |                             |                |
| No                                                           | 1453 (27)           | Ref                         | ..             |
| Yes                                                          | 336 (4)             | 1.88 (0.54, 6.51)           | 0.3183         |
| Chloroquine dose, every 5 mg/kg increase                     | 1790 (31)           | 0.72 (0.40, 1.27)           | 0.2514         |
| Age, per every 1 year increase                               | 1790 (31)           | 0.99 (0.97, 1.02)           | 0.6636         |
| Gender                                                       |                     |                             |                |
| Male                                                         | 1219 (24)           | Ref                         | ..             |
| Female                                                       | 571 (7)             | 0.52 (0.22, 1.22)           | 0.1302         |
| Parasitaemia, parasites per $\mu$ L every ten-times increase | 1790 (31)           | 1.53 (0.81, 2.86)           | 0.1882         |
| Relapse periodicity                                          |                     |                             |                |
| Long                                                         | 902 (11)            | Ref                         | ..             |
| Short                                                        | 888 (20)            | 3.16 (0.54, 18.49)          | 0.2011         |

HR – hazard ratio. CI = Confidence Interval \*Number of patients (number with recrudescence by day 42). <sup>†</sup>Primaquine dose did not have a linear association with risk of recurrence. The assumption of proportional hazards held for the model (p=0.17 according to the global test).

**Table S14. Multivariable model for rate of *P. vivax* recurrence between day 7 and 42 in patients aged less than five years receiving chloroquine alone in long relapse periodicity regions**

|                                                              | <b>Total N (n)*</b> | <b>Adjusted HR (95% CI)</b> | <b>p value</b> |
|--------------------------------------------------------------|---------------------|-----------------------------|----------------|
| Chloroquine dose, every 5 mg/kg increase                     | 197 (28)            | 0.63 (0.42, 0.96)           | 0.0314         |
| Age, every 1 year increase                                   | 197 (28)            | 0.77 (0.55, 1.10)           | 0.1513         |
| Gender                                                       |                     |                             |                |
| Male                                                         | 123 (20)            | Ref                         | Ref            |
| Female                                                       | 74 (8)              | 0.61 (0.26, 1.42)           | 0.2499         |
| Parasitaemia, parasites per $\mu$ L every ten-times increase | 197 (28)            | 1.25 (0.58, 2.73)           | 0.5688         |

HR – hazard ratio. CI = Confidence Interval \*Number of patients (number with recrudescence by day 42). The assumption of proportional hazards held for the model ( $p=0.90$  for the global test)



**Table S15. Accuracy of presence of parasite positivity in determining risk of recurrence prior to day 28 in patients receiving chloroquine alone**

| <b>Parasite presence</b> | <b>Sensitivity</b> | <b>Specificity</b>   | <b>PPV</b>         | <b>NPV</b>           |
|--------------------------|--------------------|----------------------|--------------------|----------------------|
| Day 1                    | 75.9%<br>(110/145) | 41.4%<br>(923/2231)  | 7.8%<br>(110/1418) | 96.3%<br>(923/958)   |
| Day 2                    | 38.7%<br>(82/212)  | 80.6%<br>(2161/2682) | 13.6%<br>(82/602)  | 94.3%<br>(2162/2292) |
| Day 3                    | 12.3%<br>(32/261)  | 95.8%<br>(2428/2535) | 23.0%<br>(32/139)  | 91.4%<br>(2428/2657) |

PPV = Positive predictive value; NPV = Negative predictive value.

**Table S16. Sensitivity analysis for rate of *P. vivax* recurrence between day 7 to 42 for the overall model of patients that received chloroquine alone**

| <b>Variable</b>                                              | <b>Range of HR</b> | <b>Coefficient of Variation (%)*</b> |
|--------------------------------------------------------------|--------------------|--------------------------------------|
| Chloroquine dose, per every 5 mg/kg increase                 | 0.79-0.86          | 1.37                                 |
| Age, per every 1 year increase                               | 0.96-0.97          | 0.07                                 |
| Gender                                                       |                    |                                      |
| Male                                                         | 1                  | ..                                   |
| Female                                                       | 0.93-1.00          | 0.91                                 |
| Parasitaemia, parasites per $\mu$ L every ten-times increase | 1.17-1.33          | 1.33                                 |
| Relapse periodicity                                          |                    |                                      |
| Long                                                         | 1                  | ..                                   |
| Short                                                        | 17.31-25.19        | 5.77                                 |

Sensitivity analysis was generated by removing each study site one at a time

\*The coefficient of variation calculated as standard deviation divided by the mean of the estimates. There were a total of 66 sites.

**Table S17. Sensitivity analysis for the model of rate of *P. vivax* recurrence between day 7 and 42 in patients receiving chloroquine alone aged less than 5 years**

| <b>Variable</b>                                              | <b>Range of HR</b> | <b>Coefficient of Variation (%)*</b> |
|--------------------------------------------------------------|--------------------|--------------------------------------|
| Chloroquine dose, per every 5 mg/kg increase                 | 0.53-0.64          | 2.82                                 |
| Age, per every 1 year increase                               | 0.86-0.92          | 0.93                                 |
| Gender                                                       |                    |                                      |
| Male                                                         | 1                  | ..                                   |
| Female                                                       | 0.99-1.19          | 2.47                                 |
| Parasitaemia, parasites per $\mu$ L every ten-times increase | 1.07-1.24          | 1.62                                 |
| Relapse periodicity                                          |                    |                                      |
| Long                                                         | 1                  | ..                                   |
| Short                                                        | 5.28-8.67          | 6.94                                 |

Sensitivity analysis was generated by removing each study site one at a time

\*The coefficient of variation calculated as standard deviation divided by the mean of the estimates. There were a total of 37 sites.

**Table S18. Sensitivity analysis for the model of rate of *P. vivax* recurrence between day 7 and 42 in patients receiving chloroquine alone aged five to less than 15 years**

| <b>Variable</b>                                              | <b>Range of HR</b> | <b>Coefficient of Variation (%)*</b> |
|--------------------------------------------------------------|--------------------|--------------------------------------|
| Chloroquine dose, per every 5 mg/kg increase                 | 0.67-0.87          | 3.17                                 |
| Age, per every 1 year increase                               | 0.95-0.97          | 0.33                                 |
| Gender                                                       |                    |                                      |
| Male                                                         | 1                  | ..                                   |
| Female                                                       | 1.07-1.19          | 1.46                                 |
| Parasitaemia, parasites per $\mu$ L every ten-times increase | 1.25-1.37          | 1.41                                 |
| Relapse periodicity                                          |                    |                                      |
| Long                                                         | 1                  | ..                                   |
| Short                                                        | 12.21-18.11        | 7.18                                 |

Sensitivity analysis was generated by removing each study site one at a time

\*The coefficient of variation calculated as standard deviation divided by the mean of the estimates. There were a total of 50 sites.

**Table S19. Sensitivity analysis for the model of rate of *P. vivax* recurrence between day 7 and 42 in patients receiving chloroquine alone aged 15 years or more**

| <b>Variable</b>                                              | <b>Range of HR</b> | <b>Coefficient of Variation (%)*</b> |
|--------------------------------------------------------------|--------------------|--------------------------------------|
| Chloroquine dose, per every 5 mg/kg increase                 | 0.93-1.07          | 1.57                                 |
| Age, per every 1 year increase                               | 0.96-0.97          | 0.09                                 |
| Gender                                                       |                    |                                      |
| Male                                                         | 1                  | ..                                   |
| Female                                                       | 0.73-0.87          | 2.22                                 |
| Parasitaemia, parasites per $\mu$ L every ten-times increase | 1.03-1.35          | 2.51                                 |
| Relapse periodicity                                          |                    |                                      |
| Long                                                         | 1                  | ..                                   |
| Short                                                        | 29.22-45.34        | 8.3                                  |

Sensitivity analysis was generated by removing each study site one at a time

\*The coefficient of variation calculated as standard deviation divided by the mean of the estimates. There were a total of 65 sites.

**Table S20. Sensitivity analysis for the model of rate of *P. vivax* recurrence between day 7 and 42 in patients receiving chloroquine alone or chloroquine and early primaquine**

| <b>Variable</b>                                              | <b>Range of HR</b> | <b>Coefficient of Variation (%)*</b> |
|--------------------------------------------------------------|--------------------|--------------------------------------|
| Primaquine                                                   |                    |                                      |
| No                                                           | 1                  | ..                                   |
| Yes                                                          | 0.07-0.14          | 6.74                                 |
| Chloroquine dose, per every 5 mg/kg increase                 | 0.76-0.82          | 1.27                                 |
| Age, per every 1 year increase                               | 0.96-0.97          | 0.07                                 |
| Gender                                                       |                    |                                      |
| Male                                                         | 1                  | ..                                   |
| Female                                                       | 0.91-0.96          | 0.87                                 |
| Parasitaemia, parasites per $\mu$ L every ten-times increase | 1.19-1.33          | 1.22                                 |
| Relapse periodicity                                          |                    |                                      |
| Long                                                         | 1                  | ..                                   |
| Short                                                        | 11.45-18.52        | 6.85                                 |

Sensitivity analysis was generated by removing each study site one at a time

\*The coefficient of variation calculated as standard deviation divided by the mean of the estimates. There were a total of 66 sites.

## References of studies not included in analysis

69. Alving AS, Johnson CF, Tarlov AR, Brewer GJ, Kellermeyer RW, Carson PE. Mitigation of the haemolytic effect of primaquine and enhancement of its action against exoerythrocytic forms of the Chesson strain of *Plasmodium vivax* by intermittent regimens of drug administration: a preliminary report. *Bull World Health Organ* 1960; **22**: 621-31.
70. Basavaraj HR. Observations on the treatment of 678 malaria cases with primaquine in an area free from malarial transmission in Mysore State, India. *Indian J Malariol* 1960; **14**: 269-81.
71. Diwan. Primaquin Trials as Antirelapse (Radical) Treatment for Malaria conducted in National Malaria Eradication Programme Units (East) Meerut and Mathura (Uttar Pradesh). *Bull Nat Soc India Malar Other Mosquito Borne Dis* 1962; **10**(2): 91-102.
72. Gomez Mendoza I, World Health Organization. Comparative study of two regimens of radical treatment of vivax malaria in Mexico. Geneva: World Health Organization; 1965.
73. Comer RD, Young MD, Porter JA, Jr., Gauld JR, Merritt W. Chloroquine resistance in *Plasmodium falciparum* malaria on the Pacific coast of Colombia. *Am J Trop Med Hyg* 1968; **17**(6): 795-9.
74. Fisher GU, Gordon MP, Lobel HO, Runcik K. Malaria in soldiers returning from Vietnam. Epidemiologic, therapeutic, and clinical studies. *Am J Trop Med Hyg* 1970; **19**(1): 27-39.
75. Contacos PG, Coatney GR, Collins WE, Briesch PE, Jeter MH. Five day primaquine therapy--an evaluation of radical curative activity against vivax malaria infection. *Am J Trop Med Hyg* 1973; **22**(6): 693-5.
76. Sharma MID, Sehgal PN, Vaid BK, Dubey RC, Nagendra S, Paithne PK. Effectiveness of drug schedule being followed under the National Malaria Eradication Programme, India, for radical cure of vivax malaria cases. *J Comm Dis* 1973; **5**: 167-74.
77. Contacos PG, Collins WE, Chin W, Jeter MH, Briesch PE. Combined chloroquine-primaquine therapy against vivax malaria. *Am J Trop Med Hyg* 1974; **23**(2): 310-2.
78. Kaplan MH, Bernstein LS. Improved therapy for Vietnam acquired vivax malaria. *Mil Med* 1974; **141**(6): 444-8.
79. Miller LH, Wyler DJ, Glew RH, Collins WE, Contacos PG. Sensitivity of four Central American strains of *Plasmodium vivax* to primaquine. *Am J Trop Med Hyg* 1974; **23**(2): 309-10.
80. Clyde DF, McCarthy VC. Radical cure of Chesson strain vivax malaria in man by 7, not 14, days of treatment with primaquine. *Am J Trop Med Hyg* 1977; **26**(3): 562-3.
81. Roy RG, Chakrapani KP, Dhinakaran D, Sitaraman NL, Ghosh RB. Efficacy of 5-day radical treatment of *P. vivax* infection in Tamil Nadu. *Indian J Med Res* 1977; **65**(5): 652-6.
82. Saint-Yves IF. Comparison of treatment schedules for *Plasmodium vivax* infections in the Solomon Islands. *P N G Med J* 1977; **20**(2): 62-5.
83. Cedillos RA, Warren M, Jeffery GM. Field evaluation of primaquine in the control of *Plasmodium vivax*. *Am J Trop Med Hyg* 1978; **27**(3): 466-72.
84. Roy RG, Shanmugham CA, Chakrapani KP, Ganesan AV. Results of 5-day course of radical treatment of *Plasmodium vivax* in six districts of Tamil Nadu. *Indian J Med Res* 1979; **69**: 939-43.
85. Darlow B, Vrbova H, Gibney S, Jolley D, Stace J, Alpers M. Sulfadoxine-pyrimethamine for the treatment of acute malaria in children of Papua New Guinea. II. *Plasmodium vivax*. *Am J Trop Med Hyg* 1982; **31**(1): 10-3.

86. Lal H. A comparative trial of oral chloroquine and oral co-trimoxazole in vivax malaria in children. *Am J Trop Med Hyg* 1982; **31**(3 Pt 1): 438-40.
87. Appavoo NC, Roy RG, Kapali V. Results of 3-day radical treatment of *Plasmodium vivax* in North Arcot and South Arcot Districts of Tamil Nadu. *Indian J Malariol* 1984; **21**(1): 21-4.
88. Huei BL, Shen SL, Wang KS, Gao SF, Cao SZ. [The radical efficacy of pyronaridine-primaquine combination in tertian malaria]. *Ji Sheng Chong Xue Yu Ji Sheng Chong Bing Za Zhi* 1984; **2**(4): 260-2.
89. Alcantara AK, Uylangco CV, Sangalang RP, Cross JH. A comparative clinical study of mefloquine and chloroquine in the treatment of vivax malaria. *Southeast Asian J Trop Med Public Health* 1985; **16**(4): 534-8.
90. Dixon KE, Pitaktong U, Phintuyothin P. A clinical trial of mefloquine in the treatment of *Plasmodium vivax* malaria. *Am J Trop Med Hyg* 1985; **34**(3): 435-7.
91. Harinasuta T, Bunnag D, Lasserre R, Leimer R, Vinijanont S. Trials of mefloquine in vivax and of mefloquine plus 'fansidar' in falciparum malaria. *Lancet* 1985; **1**(8434): 885-8.
92. Ebisawa I, Ohara H. A combination of sulfamonomethoxine and pyrimethamine versus other drugs for the treatment of malaria. *Jpn J Exp Med* 1986; **56**(5): 213-9.
93. Maisonneuve H, Joly F, John M, Carles G, Rossignol JF. [Efficacy of halofantrine in *Plasmodium falciparum* or *Plasmodium vivax* malaria in a resistance area (French Guiana)]. *Presse Med* 1988; **17**(3): 99-102.
94. Da Silva AR, Silva Cde M, Branco Mdos R, Branco Filho JR. [Results of the use of a therapeutic protocol for *Plasmodium vivax* for 5 days in 3 municipalities of the Sao Luis Island, State of Maranhao, Brazil]. *Rev Soc Bras Med Trop* 1989; **22**(3): 131-6.
95. Sinha S, Dua VK, Sharma VP. Efficacy of 5 day radical treatment of primaquine in *Plasmodium vivax* cases at the BHEL industrial complex, Hardwar (U.P.). *Indian J Malariol* 1989; **26**(2): 83-6.
96. Singh N, Mishra AK, Sharma VP. Radical treatment of vivax malaria in Madhya Pradesh, India. *Indian J Malariol* 1990; **27**(1): 55-6.
97. Bunnag D, Karbwang J, Thanavibul A, et al. High dose of primaquine in primaquine resistant vivax malaria. *Trans R Soc Trop Med Hyg* 1994; **88**(2): 218-9.
98. Pukrittayakamee S, Vanijanonta S, Chantra A, Clemens R, White NJ. Blood stage antimalarial efficacy of primaquine in *Plasmodium vivax* malaria. *J Infect Dis* 1994; **169**(4): 932-5.
99. Prasad RN, Virk KJ, Sharma VP. Relapse/reinfection patterns of *Plasmodium vivax* infection: a four year study. *Southeast Asian J Trop Med Public Health* 1991; **22**(4): 499-503.
100. Jagota SC. Halofantrine in the treatment of acute malaria: a multi-centre study in 268 patients. *Curr Med Res Opin* 1993; **13**(3): 140-4.
101. Nguyen DS, Dao BH, Nguyen PD, et al. Treatment of malaria in Vietnam with oral artemisinin. *Am J Trop Med Hyg* 1993; **48**(3): 398-402.
102. Rao KS, Kamalakar KV. Efficacy and safety of halofantrine in acute malaria. *J Assoc Physicians India* 1993; **41**(8): 507-8.
103. Li GQ, Guo XB, Fu LC, Jian HX, Wang XH. Clinical trials of artemisinin and its derivatives in the treatment of malaria in China. *Trans R Soc Trop Med Hyg* 1994; **88** Suppl 1: S5-6.
104. Pukrittayakamee S, Viravan C, Charoenlarp P, Yeamput C, Wilson RJ, White NJ. Antimalarial effects of rifampin in *Plasmodium vivax* malaria. *Antimicrob Agents Chemother* 1994; **38**(3): 511-4.



105. Baird JK, Basri H, Subianto B, et al. Treatment of chloroquine-resistant *Plasmodium vivax* with chloroquine and primaquine or halofantrine. *J Infect Dis* 1995; **171**(6): 1678-82.
106. Jelinek T, Nothdurft HD, Von Sonnenburg F, Loscher T. Long-term efficacy of primaquine in the treatment of vivax malaria in nonimmune travelers. *Am J Trop Med Hyg* 1995; **52**(4): 322-4.
107. Potkar CN, Kshirsagar NA, Kathuria R. Resurgence of malaria and drug resistance in *Plasmodium falciparum* and *Plasmodium vivax* species in Bombay. *J Assoc Physicians India* 1995; **43**(5): 336-8.
108. Marlar T, Myat Phone K, Aye Yu S, Khaing Khaing G, Ma S, Myint O. Development of resistance to chloroquine by *Plasmodium vivax* in Myanmar. *Trans R Soc Trop Med Hyg* 1995; **89**(3): 307-8.
109. Baird JK, Sustriayu Nalim MF, Basri H, et al. Survey of resistance to chloroquine by *Plasmodium vivax* in Indonesia. *Trans R Soc Trop Med Hyg* 1996; **90**(4): 409-11.
110. Baird JK, Sismadi P, Masbar S, et al. Chloroquine sensitive *Plasmodium falciparum* and *P. vivax* in central Java, Indonesia. *Trans R Soc Trop Med Hyg* 1996; **90**(4): 412-3.
111. Baird JK, Caneta-Miguel E, Masbar S, et al. Survey of resistance to chloroquine of falciparum and vivax malaria in Palawan, The Philippines. *Trans R Soc Trop Med Hyg* 1996; **90**(4): 413-4.
112. Looareesuwan S, Viravan C, Webster HK, Kyle DE, Hutchinson DB, Canfield CJ. Clinical studies of atovaquone, alone or in combination with other antimalarial drugs, for treatment of acute uncomplicated malaria in Thailand. *Am J Trop Med Hyg* 1996; **54**(1): 62-6.
113. Srivastava HC, Sharma SK, Bhatt RM, Sharma VP. Studies on *Plasmodium vivax* relapse pattern in Kheda district, Gujarat. *Indian J Malariol* 1996; **33**(4): 173-9.
114. Baird JK, Wiady I, Fryauff DJ, et al. In vivo resistance to chloroquine by *Plasmodium vivax* and *Plasmodium falciparum* at Nabire, Irian Jaya, Indonesia. *Am J Trop Med Hyg* 1997; **56**(6): 627-31.
115. Fryauff DJ, Baird JK, Candradikusuma D, et al. Survey of in vivo sensitivity to chloroquine by *Plasmodium falciparum* and *P. vivax* in Lombok, Indonesia. *Am J Trop Med Hyg* 1997; **56**(2): 241-4.
116. Fryauff DJ, Baird JK, Basri H, et al. Halofantrine and primaquine for radical cure of malaria in Irian Jaya, Indonesia. *Ann Trop Med Parasitol* 1997; **91**(1): 7-16.
117. Xu C, Ding Y, Qi Z. [Efficacy of dihydroartemisinin in treatment of 37 malaria cases]. *Zhonghua Nei Ke Za Zhi* 1997; **36**(3): 187-9.
118. Fryauff DJ, Tuti S, Mardi A, et al. Chloroquine-resistant *Plasmodium vivax* in transmigration settlements of West Kalimantan, Indonesia. *Am J Trop Med Hyg* 1998; **59**(4): 513-8.
119. Fryauff DJ, Soekartono, Tuti S, et al. Survey of resistance in vivo to chloroquine of *Plasmodium falciparum* and *P. vivax* in North Sulawesi, Indonesia. *Trans R Soc Trop Med Hyg* 1998; **92**(1): 82-3.
120. Gogtay N, Garg M, Kadam V, Kamtekar K, Kshirsagar NA. A 5 days primaquine regimen as anti-relapse therapy for *Plasmodium vivax*. *Trans R Soc Trop Med Hyg* 1998; **92**(3): 341.
121. Pinto AY, Ventura AM, Calvosa VS, et al. [Clinical efficacy of four schemes for vivax malaria treatment in children]. *J Pediatr (Rio J)* 1998; **74**(3): 222-7.
122. Fryauff DJ, Sumawinata I, Purnomo, et al. In vivo responses to antimalarials by *Plasmodium falciparum* and *Plasmodium vivax* from isolated Gag Island off northwest Irian Jaya, Indonesia. *Am J Trop Med Hyg* 1999; **60**(4): 542-6.

123. Gogtay NJ, Desai S, Kamtekar KD, Kadam VS, Dalvi SS, Kshirsagar NA. Efficacies of 5- and 14-day primaquine regimens in the prevention of relapses in *Plasmodium vivax* infections. *Ann Trop Med Parasitol* 1999; **93**(8): 809-12.
124. Kaneko A, Bergqvist Y, Takechi M, et al. Intrinsic efficacy of proguanil against falciparum and vivax malaria independent of the metabolite cycloguanil. *J Infect Dis* 1999; **179**(4): 974-9.
125. Li X, Li C, Che L, et al. [Observation on efficacy of artemether compound against vivax malaria]. *Zhongguo Ji Sheng Chong Xue Yu Ji Sheng Chong Bing Za Zhi* 1999; **17**(3): 175-7.
126. Lim CS, Kim YK, Lee KN, et al. Response to chloroquine of *Plasmodium vivax* among South Korean soldiers. *Ann Trop Med Parasitol* 1999; **93**(6): 565-8.
127. Looareesuwan S, Wilairatana P, Glanarongran R, et al. Atovaquone and proguanil hydrochloride followed by primaquine for treatment of *Plasmodium vivax* malaria in Thailand. *Trans R Soc Trop Med Hyg* 1999; **93**(6): 637-40.
128. Looareesuwan S, Wilairatana P, Krudsood S, et al. Chloroquine sensitivity of *Plasmodium vivax* in Thailand. *Ann Trop Med Parasitol* 1999; **93**(3): 225-30.
129. Rowland M, Durrani N. Randomized controlled trials of 5- and 14-days primaquine therapy against relapses of vivax malaria in an Afghan refugee settlement in Pakistan. *Trans R Soc Trop Med Hyg* 1999; **93**(6): 641-3.
130. Walsh DS, Looareesuwan S, Wilairatana P, et al. Randomized dose-ranging study of the safety and efficacy of WR 238605 (Tafenoquine) in the prevention of relapse of *Plasmodium vivax* malaria in Thailand. *J Infect Dis* 1999; **180**(4): 1282-7.
131. Wilairatana P, Silachamroon U, Krudsood S, et al. Efficacy of primaquine regimens for primaquine-resistant *Plasmodium vivax* malaria in Thailand. *Am J Trop Med Hyg* 1999; **61**(6): 973-7.
132. Pukrittayakamee S, Clemens R, Chantira A, et al. Therapeutic responses to antibacterial drugs in vivax malaria. *Trans R Soc Trop Med Hyg* 2001; **95**(5): 524-8.
133. Lacy MD, Maguire JD, Barcus MJ, et al. Atovaquone/proguanil therapy for *Plasmodium falciparum* and *Plasmodium vivax* malaria in Indonesians who lack clinical immunity. *Clin Infect Dis* 2002; **35**(9): e92-5.
134. Silachamroon U, Krudsood S, Treeprasertsuk S, et al. Clinical trial of oral artesunate with or without high-dose primaquine for the treatment of vivax malaria in Thailand. *Am J Trop Med Hyg* 2003; **69**(1): 14-8.
135. Hamedi Y, Safa O, Zare S, Tan-ariya P, Kojima S, Looareesuwan S. Therapeutic efficacy of artesunate in *Plasmodium vivax* malaria in Thailand. *Southeast Asian J Trop Med Public Health* 2004; **35**(3): 570-4.
136. Khan MZ, Isani Z, Ahmed TM, et al. Efficacy and safety of halofantrine in Pakistani children and adults with malaria caused by *P. falciparum* and *P. vivax*. *Southeast Asian J Trop Med Public Health* 2006; **37**(4): 613-8.
137. Dao NV, Cuong BT, Ngoa ND, et al. Vivax malaria: preliminary observations following a shorter course of treatment with artesunate plus primaquine. *Trans R Soc Trop Med Hyg* 2007; **101**(6): 534-9.
138. Hasugian AR, Purba HL, Kenangalem E, et al. Dihydroartemisinin-piperaquine versus artesunate-amodiaquine: superior efficacy and posttreatment prophylaxis against multidrug-resistant *Plasmodium falciparum* and *Plasmodium vivax* malaria. *Clin Infect Dis* 2007; **44**(8): 1067-74.
139. Ratcliff A, Siswantoro H, Kenangalem E, et al. Two fixed-dose artemisinin combinations for drug-resistant falciparum and vivax malaria in Papua, Indonesia: an open-label randomised comparison. *Lancet* 2007; **369**(9563): 757-65.
140. Barnadas C, Tichit M, Bouchier C, et al. *Plasmodium vivax dhfr* and *dhps* mutations in isolates from Madagascar and therapeutic response to sulphadoxine-pyrimethamine. *Malar J* 2008; **7**: 35.

141. Krudsood S, Tangpukdee N, Wilairatana P, et al. High-dose primaquine regimens against relapse of *Plasmodium vivax* malaria. *Am J Trop Med Hyg* 2008; **78**(5): 736-40.
142. Hasugian AR, Tjitra E, Ratcliff A, et al. In vivo and in vitro efficacy of amodiaquine monotherapy for treatment of infection by chloroquine-resistant *Plasmodium vivax*. *Antimicrob Agents Chemother* 2009; **53**(3): 1094-9.
143. Congpuong K, Bualombai P, Banmairuroi V, Na-Bangchang K. Compliance with a three-day course of artesunate-mefloquine combination and baseline anti-malarial treatment in an area of Thailand with highly multidrug resistant falciparum malaria. *Malar J* 2010; **9**: 43.
144. Pukrittayakamee S, Imwong M, Chotivanich K, Singhasivanon P, Day NP, White NJ. A comparison of two short-course primaquine regimens for the treatment and radical cure of *Plasmodium vivax* malaria in Thailand. *Am J Trop Med Hyg* 2010; **82**(4): 542-7.
145. Abdallah TM, Ali AA, Bakri M, Gasim GI, Musa IR, Adam I. Efficacy of artemether-lumefantrine as a treatment for uncomplicated *Plasmodium vivax* malaria in eastern Sudan. *Malar J* 2012; **11**: 404.
146. Betuela I, Rosanas-Urgell A, Kiniboro B, et al. Relapses contribute significantly to the risk of *Plasmodium vivax* infection and disease in Papua New Guinean children 1-5 years of age. *J Infect Dis* 2012; **206**(11): 1771-80.
147. Eibach D, Ceron N, Krishnalall K, et al. Therapeutic efficacy of artemether-lumefantrine for *Plasmodium vivax* infections in a prospective study in Guyana. *Malar J* 2012; **11**: 347.
148. Tjitra E, Hasugian AR, Siswantoro H, et al. Efficacy and safety of artemisinin-naphthoquine versus dihydroartemisinin-piperaquine in adult patients with uncomplicated malaria: a multi-centre study in Indonesia. *Malar J* 2012; **11**: 153.
149. Pasaribu AP, Chocejindachai W, Sirivichayakul C, et al. A randomized comparison of dihydroartemisinin-piperaquine and artesunate-amodiaquine combined with primaquine for radical treatment of vivax malaria in Sumatera, Indonesia. *J Infect Dis* 2013; **208**(11): 1906-13.
150. Senn N, Rarau P, Manong D, et al. Effectiveness of artemether/lumefantrine for the treatment of uncomplicated *Plasmodium vivax* and *P. falciparum* malaria in young children in Papua New Guinea. *Clin Infect Dis* 2013; **56**(10): 1413-20.
151. Sutanto I, Tjahjono B, Basri H, et al. Randomized, open-label trial of primaquine against vivax malaria relapse in Indonesia. *Antimicrob Agents Chemother* 2013; **57**(3): 1128-35.
152. Laman M, Moore BR, Benjamin JM, et al. Artemisinin-naphthoquine versus artemether-lumefantrine for uncomplicated malaria in Papua New Guinean children: an open-label randomized trial. *PLoS Med* 2014; **11**(12): e1001773.
153. Lon C, Manning JE, Vanachayangkul P, et al. Efficacy of two versus three-day regimens of dihydroartemisinin-piperaquine for uncomplicated malaria in military personnel in northern Cambodia: an open-label randomized trial. *PLoS One* 2014; **9**(3): e93138.
154. Kheng S, Muth S, Taylor WR, et al. Tolerability and safety of weekly primaquine against relapse of *Plasmodium vivax* in Cambodians with glucose-6-phosphate dehydrogenase deficiency. *BMC Med* 2015; **13**: 203.
155. Nelwan EJ, Ekawati LL, Tjahjono B, et al. Randomized trial of primaquine hypnozoitocidal efficacy when administered with artemisinin-combined blood schizontocides for radical cure of *Plasmodium vivax* in Indonesia. *BMC Med* 2015; **13**: 294.
156. Alecrim MG, Carvalho LM, Fernandes MC, et al. [Malaria treatment with artesunate (retocaps) in children of the Brazilian Amazon]. *Rev Soc Bras Med Trop* 2000; **33**(2): 163-8.

157. Fernandopulle BM, Weeraratne CL, Weerasuriya K, Karunaweera ND. Efficacy of a five-day course of primaquine in preventing relapses in *Plasmodium vivax* malaria--a pilot study. *Ceylon Med J* 2003; **48**(1): 32.
158. Yeramian P, Meshnick SR, Krudsood S, et al. Efficacy of DB289 in Thai patients with *Plasmodium vivax* or acute, uncomplicated *Plasmodium falciparum* infections. *J Infect Dis* 2005; **192**(2): 319-22.
159. Benjamin J, Moore B, Lee ST, et al. Artemisinin-naphthoquine combination therapy for uncomplicated pediatric malaria: a tolerability, safety, and preliminary efficacy study. *Antimicrob Agents Chemother* 2012; **56**(5): 2465-71.
160. Marfurt J, Mueller I, Sie A, et al. Low efficacy of amodiaquine or chloroquine plus sulfadoxine-pyrimethamine against *Plasmodium falciparum* and *P. vivax* malaria in Papua New Guinea. *Am J Trop Med Hyg* 2007; **77**(5): 947-54.
161. Karunajeewa HA, Mueller I, Senn M, et al. A trial of combination antimalarial therapies in children from Papua New Guinea. *N Engl J Med* 2008; **359**(24): 2545-57.
162. Phyo AP, Jittamala P, Nosten FH, et al. Antimalarial activity of artefenomel (OZ439), a novel synthetic antimalarial endoperoxide, in patients with *Plasmodium falciparum* and *Plasmodium vivax* malaria: an open-label phase 2 trial. *Lancet Infect Dis* 2016; **16**(1): 61-9.
163. White NJ, Duong TT, Uthaisin C, et al. Antimalarial Activity of KAF156 in Falciparum and Vivax Malaria. *N Engl J Med* 2016; **375**(12): 1152-60.
164. McGready R, Thwai KL, Cho T, et al. The effects of quinine and chloroquine antimalarial treatments in the first trimester of pregnancy. *Trans R Soc Trop Med Hyg* 2002; **96**(2): 180-4.
165. Moore BR, Benjamin JM, Auyeung SO, et al. Safety, tolerability and pharmacokinetic properties of coadministered azithromycin and piperazine in pregnant Papua New Guinean women. *Br J Clin Pharmacol* 2016; **82**(1): 199-212.
166. Taylor WR, Doan HN, Nguyen DT, et al. Assessing drug sensitivity of *Plasmodium vivax* to halofantrine or chloroquine in southern, central Vietnam using an extended 28-day in vivo test and polymerase chain reaction genotyping. *Am J Trop Med Hyg* 2000; **62**(6): 693-7.
167. Adak T, Valecha N, Sharma VP. *Plasmodium vivax* polymorphism in a clinical drug trial. *Clin Diagn Lab Immunol* 2001; **8**(5): 891-4.
168. Carmona-Fonseca J. Vivax malaria in children: Recurrences with standard total dose of primaquine administered in 3 vs. 7 days *Iatreia* 2010; **23**(1): 10-20.
169. Carmona-Fonseca J, Maestre A. Prevention of *Plasmodium vivax* malaria recurrence: efficacy of the standard total dose of primaquine administered over 3 days. *Acta Trop* 2009; **112**(2): 188-92.
170. Saravu K, Acharya V, Kumar K, Kumar R. *Plasmodium vivax* remains responsive to chloroquine with primaquine treatment regimen: a prospective cohort study from tertiary care teaching hospital in southern India. *Trop Doct* 2012; **42**(3): 163-4.
171. Llanos-Cuentas A, Lacerda MV, Rueangweerayut R, et al. Tafenoquine plus chloroquine for the treatment and relapse prevention of *Plasmodium vivax* malaria (DETECTIVE): a multicentre, double-blind, randomised, phase 2b dose-selection study. *Lancet* 2014; **383**(9922): 1049-58.
172. Mishra N, Srivastava B, Bharti RS, et al. Monitoring the efficacy of antimalarial medicines in India via sentinel sites: Outcomes and risk factors for treatment failure. *J Vector Borne Dis* 2016; **53**(2): 168-78.

173. Valecha N, Savargaonkar D, Srivastava B, et al. Comparison of the safety and efficacy of fixed-dose combination of arterolane maleate and piperazine phosphate with chloroquine in acute, uncomplicated *Plasmodium vivax* malaria: a phase III, multicentric, open-label study. *Malar J* 2016; **15**: 42.
174. Bergonzoli G, Rivers Cuadra JC. [Therapeutic efficacy of different antimalarial regimens in the Costa Rica-Nicaragua border region]. *Rev Panam Salud Publica* 2000; **7**(6): 366-70.
175. Abdon NP, Pinto AY, das Silva Rdo S, de Souza JM. [Assessment of the response to reduced treatment schemes for vivax malaria]. *Rev Soc Bras Med Trop* 2001; **34**(4): 343-8.
176. Mohapatra MK, Padhiary KN, Mishra DP, Sethy G. Atypical manifestations of *Plasmodium vivax* malaria. *Indian J Malariol* 2002; **39**(1-2): 18-25.
177. da Silva Rdo S, Pinto AY, Calvosa VS, de Souza JM. [Short course schemes for vivax malaria treatment]. *Rev Soc Bras Med Trop* 2003; **36**(2): 235-9.
178. Nandy A, Addy M, Maji AK, Bandyopadhyay AK. Monitoring the chloroquine sensitivity of *Plasmodium vivax* from Calcutta and Orissa, India. *Ann Trop Med Parasitol* 2003; **97**(3): 215-20.
179. Ruebush TK, 2nd, Zegarra J, Cairo J, et al. Chloroquine-resistant *Plasmodium vivax* malaria in Peru. *Am J Trop Med Hyg* 2003; **69**(5): 548-52.
180. Kurcer MA, Simsek Z, Zeyrek FY, et al. Efficacy of chloroquine in the treatment of *Plasmodium vivax* malaria in Turkey. *Ann Trop Med Parasitol* 2004; **98**(5): 447-51.
181. Kurcer MA, Simsek Z, Kurcer Z. The decreasing efficacy of chloroquine in the treatment of *Plasmodium vivax* malaria, in Sanliurfa, south-eastern Turkey. *Ann Trop Med Parasitol* 2006; **100**(2): 109-13.
182. Walsh DS, Wilairatana P, Tang DB, et al. Randomized trial of 3-dose regimens of tafenoquine (WR238605) versus low-dose primaquine for preventing *Plasmodium vivax* malaria relapse. *Clin Infect Dis* 2004; **39**(8): 1095-103.
183. Dunne MW, Singh N, Shukla M, et al. A double-blind, randomized study of azithromycin compared to chloroquine for the treatment of *Plasmodium vivax* malaria in India. *Am J Trop Med Hyg* 2005; **73**(6): 1108-11.
184. Krudsood S, Wilairatana P, Tangpukdee N, et al. Safety and tolerability of elubaquine (bulaquine, CDRI 80/53) for treatment of *Plasmodium vivax* malaria in Thailand. *Korean J Parasitol* 2006; **44**(3): 221-8.
185. de Santana Filho FS, Arcanjo AR, Chehuan YM, et al. Chloroquine-resistant *Plasmodium vivax*, Brazilian Amazon. *Emerg Infect Dis* 2007; **13**(7): 1125-6.
186. Lee SW, Lee M, Lee DD, et al. Biological resistance of hydroxychloroquine for *Plasmodium vivax* malaria in the Republic of Korea. *Am J Trop Med Hyg* 2009; **81**(4): 600-4.
187. Liang GL, Sun XD, Wang J, Zhang ZX. [Sensitivity of *Plasmodium vivax* to chloroquine in Laza City, Myanmar]. *Zhongguo Ji Sheng Chong Xue Yu Ji Sheng Chong Bing Za Zhi* 2009; **27**(2): 175-6.
188. Rogers WO, Sem R, Tero T, et al. Failure of artesunate-mefloquine combination therapy for uncomplicated *Plasmodium falciparum* malaria in southern Cambodia. *Malar J* 2009; **8**: 10.
189. Leslie T, Rab MA, Ahmadzai H, et al. Compliance with 14-day primaquine therapy for radical cure of vivax malaria--a randomized placebo-controlled trial comparing unsupervised with supervised treatment. *Trans R Soc Trop Med Hyg* 2004; **98**(3): 168-73.
190. Alvarez G, Pineros JG, Tobon A, et al. Efficacy of three chloroquine-primaquine regimens for treatment of *Plasmodium vivax* malaria in Colombia. *Am J Trop Med Hyg* 2006; **75**(4): 605-9.

191. Carmona-Fonseca J, Uscategui RM, Correa AM. Vivax malaria in children: Clinical features and response to chloroquine. [Spanish]. *Colombia Medica* 2008; **39**(4): 364-77.
192. Orjuela-Sanchez P, da Silva NS, da Silva-Nunes M, Ferreira MU. Recurrent parasitemias and population dynamics of *Plasmodium vivax* polymorphisms in rural Amazonia. *Am J Trop Med Hyg* 2009; **81**(6): 961-8.
193. Daneshvar C, Davis TM, Cox-Singh J, et al. Clinical and parasitological response to oral chloroquine and primaquine in uncomplicated human *Plasmodium knowlesi* infections. *Malar J* 2010; **9**: 238.
194. Manandhar S, Bhusal CL, Ghimire U, Singh SP, Karmacharya DB, Dixit SM. A study on relapse/re-infection rate of *Plasmodium vivax* malaria and identification of the predominant genotypes of *P. vivax* in two endemic districts of Nepal. *Malar J* 2013; **12**: 324.
195. Shalini S, Chaudhuri S, Sutton PL, et al. Chloroquine efficacy studies confirm drug susceptibility of *Plasmodium vivax* in Chennai, India. *Malar J* 2014; **13**: 129.
196. Genton B, Baea K, Lorry K, Ginny M, Wines B, Alpers MP. Parasitological and clinical efficacy of standard treatment regimens against *Plasmodium falciparum*, *P. vivax* and *P. malariae* in Papua New Guinea. *P N G Med J* 2005; **48**(3-4): 141-50.
197. Kolaczinski K, Durrani N, Rahim S, Rowland M. Sulfadoxine-pyrimethamine plus artesunate compared with chloroquine for the treatment of vivax malaria in areas co-endemic for *Plasmodium falciparum* and *P. vivax*: a randomised non-inferiority trial in eastern Afghanistan. *Trans R Soc Trop Med Hyg* 2007; **101**(11): 1081-7.
198. Barnadas C, Ratsimbao A, Tichit M, et al. *Plasmodium vivax* resistance to chloroquine in Madagascar: clinical efficacy and polymorphisms in *pvm-dr1* and *pvcr-t* genes. *Antimicrob Agents Chemother* 2008; **52**(12): 4233-40.
199. Teka H, Petros B, Yamuah L, et al. Chloroquine-resistant *Plasmodium vivax* malaria in Debre Zeit, Ethiopia. *Malar J* 2008; **7**: 220.
200. Ketema T, Getahun K, Bacha K. Therapeutic efficacy of chloroquine for treatment of *Plasmodium vivax* malaria cases in Halaba district, South Ethiopia. *Parasit Vectors* 2011; **4**: 46.
201. Anez A, Navarro-Costa D, Yucra O, et al. [Therapeutic response of *Plasmodium vivax* to chloroquine in Bolivia]. *Biomedica* 2012; **32**(4): 527-35.
202. Baird JK, Tiwari T, Martin GJ, et al. Chloroquine for the treatment of uncomplicated malaria in Guyana. *Ann Trop Med Parasitol* 2002; **96**(4): 339-48.
203. Pukrittayakamee S, Chantra A, Simpson JA, et al. Therapeutic responses to different antimalarial drugs in vivax malaria. *Antimicrob Agents Chemother* 2000; **44**(6): 1680-5.
204. Singh RK. Emergence of chloroquine-resistant vivax malaria in south Bihar (India). *Trans R Soc Trop Med Hyg* 2000; **94**(3): 327.
205. Villalobos-Salcedo JM, Tada MS, Kimura E, Menezes MJ, Pereira da Silva LH. In-vivo sensitivity of *Plasmodium vivax* isolates from Rondônia (western Amazon region, Brazil) to regimens including chloroquine and primaquine. *Ann Trop Med Parasitol* 2000; **94**(8): 749-58.
206. Buchachart K, Krudsood S, Singhasivanon P, et al. Effect of primaquine standard dose (15 mg/day for 14 days) in the treatment of vivax malaria patients in Thailand. *Southeast Asian J Trop Med Public Health* 2001; **32**(4): 720-6.
207. Dua VK, Sharma VP. *Plasmodium vivax* relapses after 5 days of primaquine treatment, in some industrial complexes of India. *Ann Trop Med Parasitol* 2001; **95**(7): 655-9.

208. Duarte EC, Pang LW, Ribeiro LC, Fontes CJ. Association of subtherapeutic dosages of a standard drug regimen with failures in preventing relapses of vivax malaria. *Am J Trop Med Hyg* 2001; **65**(5): 471-6.
209. Soto J, Toledo J, Gutierrez P, et al. *Plasmodium vivax* clinically resistant to chloroquine in Colombia. *Am J Trop Med Hyg* 2001; **65**(2): 90-3.
210. Maguire JD, Lacy MD, Sururi, et al. Chloroquine or sulfadoxine-pyrimethamine for the treatment of uncomplicated, *Plasmodium falciparum* malaria during an epidemic in Central Java, Indonesia. *Ann Trop Med Parasitol* 2002; **96**(7): 655-68.
211. Fryauff DJ, Leksana B, Masbar S, et al. The drug sensitivity and transmission dynamics of human malaria on Nias Island, North Sumatra, Indonesia. *Ann Trop Med Parasitol* 2002; **96**(5): 447-62.
212. Castillo CM, Osorio LE, Palma GI. Assessment of therapeutic response of *Plasmodium vivax* and *Plasmodium falciparum* to chloroquine in a Malaria transmission free area in Colombia. *Mem Inst Oswaldo Cruz* 2002; **97**(4): 559-62.
213. Congpuong K, Na-Bangchang K, Thimasarn K, Tasanor U, Wernsdorfer WH. Sensitivity of *Plasmodium vivax* to chloroquine in Sa Kaeo Province, Thailand. *Acta Trop* 2002; **83**(2): 117-21.
214. Hamedi Y, Nateghpour M, Tan-ariya P, Tiensuwan M, Silachamroon U, Looareesuwan S. *Plasmodium vivax* malaria in Southeast Iran in 1999-2001: establishing the response to chloroquine in vitro and in vivo. *Southeast Asian J Trop Med Public Health* 2002; **33**(3): 512-8.
215. Tjitra E, Baker J, Suprianto S, Cheng Q, Anstey NM. Therapeutic efficacies of artesunate-sulfadoxine-pyrimethamine and chloroquine-sulfadoxine-pyrimethamine in vivax malaria pilot studies: relationship to *Plasmodium vivax dhfr* mutations. *Antimicrob Agents Chemother* 2002; **46**(12): 3947-53.
216. Blair-Trujillo S, Castano AT, Restrepo ME, Sanchez GA, Carmona-Fonseca J. [Adequate clinical and parasitological *Plasmodium vivax* response to chloroquine in Colombia (Turbo, Antioquia), 2001]. *Infectio* 2002; **6**(1): 21-6.
217. Yadav RS, Ghosh SK. Radical curative efficacy of five-day regimen of primaquine for treatment of *Plasmodium vivax* malaria in India. *J Parasitol* 2002; **88**(5): 1042-4.
218. Machado RL, de Figueredo Filho AF, Calvosa VS, Figueredo MC, Nascimento JM, Povoá MM. Correlation between *Plasmodium vivax* variants in Belem, Para State, Brazil and symptoms and clearance of parasitaemia. *Braz J Infect Dis* 2003; **7**(3): 175-7.
219. Pinto AY, Azevedo CH, da Silva JB, de Souza JM. Assessment of chloroquine single dose treatment of malaria due to *Plasmodium vivax* in Brazilian Amazon. *Rev Inst Med Trop Sao Paulo* 2003; **45**(6): 327-31.
220. Rajgor DD, Gogtay NJ, Kadam VS, et al. Efficacy of a 14-day primaquine regimen in preventing relapses in patients with *Plasmodium vivax* malaria in Mumbai, India. *Trans R Soc Trop Med Hyg* 2003; **97**(4): 438-40.
221. Sumawinata IW, Bernadeta, Leksana B, et al. Very high risk of therapeutic failure with chloroquine for uncomplicated *Plasmodium falciparum* and *P. vivax* malaria in Indonesian Papua. *Am J Trop Med Hyg* 2003; **68**(4): 416-20.
222. Valibayov A, Abdullayev F, Mammadov S, et al. Clinical efficacy of chloroquine followed by primaquine for *Plasmodium vivax* treatment in Azerbaijan. *Acta Trop* 2003; **88**(1): 99-102.
223. Hapuarachchi HA, Dayanath MY, Abeysundara S, Bandara KB, Abeyewickreme W, de Silva NR. Chloroquine resistant falciparum malaria among security forces personnel in the Northern Province of Sri Lanka. *Ceylon Med J* 2004; **49**(2): 47-51.

224. Vijaykadga S, Rojanawatsirivej C, Congpoung K, et al. Assessment of therapeutic efficacy of chloroquine for vivax malaria in Thailand. *Southeast Asian J Trop Med Public Health* 2004; **35**(3): 566-9.
225. Maguire JD, Krisin, Marwoto H, Richie TL, Fryauff DJ, Baird JK. Mefloquine is highly efficacious against chloroquine-resistant *Plasmodium vivax* malaria and *Plasmodium falciparum* malaria in Papua, Indonesia. *Clin Infect Dis* 2006; **42**(8): 1067-72.
226. Tasanor O, Ruengweerayut R, Sirichaisinthop J, Congpuong K, Wernsdorfer WH, Na-Bangchang K. Clinical-parasitological response and in-vitro sensitivity of *Plasmodium vivax* to chloroquine and quinine on the western border of Thailand. *Trans R Soc Trop Med Hyg* 2006; **100**(5): 410-8.
227. Krudsood S, Tangpukdee N, Muangnoicharoen S, et al. Clinical efficacy of chloroquine versus artemether-lumefantrine for *Plasmodium vivax* treatment in Thailand. *Korean J Parasitol* 2007; **45**(2): 111-4.
228. Nateghpour M, Sayedzadeh SA, Edrissian GH, et al. Evaluation of Sensitivity of *Plasmodium vivax* to Chloroquine. *Iran J Public Health* 2007; **36**(3): 60-3.
229. Osorio L, Perez Ldel P, Gonzalez IJ. [Assessment of the efficacy of antimalarial drugs in Tarapaca, in the Colombian Amazon basin]. *Biomedica* 2007; **27**(1): 133-40.
230. Perez MA, Cortes LJ, Guerra AP, Knudson A, Usta C, Nicholls RS. [Efficacy of the amodiaquine+sulfadoxine-pyrimethamine combination and of chloroquine for the treatment of malaria in Cordoba, Colombia, 2006]. *Biomedica* 2008; **28**(1): 148-59.
231. Srivastava HC, Yadav RS, Joshi H, et al. Therapeutic responses of *Plasmodium vivax* and *P. falciparum* to chloroquine, in an area of western India where *P. vivax* predominates. *Ann Trop Med Parasitol* 2008; **102**(6): 471-80.
232. Nateghpour M, Edrissian G, Torabi A, et al. Monitoring of *Plasmodium vivax* and *Plasmodium falciparum* response to chloroquine in Bandar-Abbas district, Hormozgan province, Iran. [Arabic]. *Tehran Uni Med J* 2009; **67**(3): 178-83.
233. Dilmeç F, Kurcer MA, Akkafa F, Simsek Z. Monitoring of failure of chloroquine treatment for *Plasmodium vivax* using polymerase chain reaction in Sanliurfa province, Turkey. *Parasitol Res* 2010; **106**(4): 783-8.
234. Kinzer MH, Chand K, Basri H, et al. Active case detection, treatment of falciparum malaria with combined chloroquine and sulphadoxine/pyrimethamine and vivax malaria with chloroquine and molecular markers of anti-malarial resistance in the Republic of Vanuatu. *Malar J* 2010; **9**: 89.
235. Takeuchi R, Lawpoolsri S, Imwong M, et al. Directly-observed therapy (DOT) for the radical 14-day primaquine treatment of *Plasmodium vivax* malaria on the Thai-Myanmar border. *Malar J* 2010; **9**: 308.
236. Yeshiwondim AK, Tekle AH, Dengela DO, Yohannes AM, Teklehaimanot A. Therapeutic efficacy of chloroquine and chloroquine plus primaquine for the treatment of *Plasmodium vivax* in Ethiopia. *Acta Trop* 2010; **113**(2): 105-13.
237. Asih PB, Syafruddin D, Leake J, et al. Phenotyping clinical resistance to chloroquine in *Plasmodium vivax* in northeastern Papua, Indonesia. *Int J Parasitol Drugs Drug Resist* 2011; **1**(1): 28-32.
238. Congpuon K, Satimai W, Sujariyakul A, et al. In vivo sensitivity monitoring of chloroquine for the treatment of uncomplicated vivax malaria in four bordered provinces of Thailand during 2009-2010. *J Vector Borne Dis* 2011; **48**(4): 190-6.
239. Maneeboonyang W, Lawpoolsri S, Puangsa-Art S, et al. Directly observed therapy with primaquine to reduce the recurrence rate of *Plasmodium vivax* infection along the Thai-Myanmar border. *Southeast Asian J Trop Med Public Health* 2011; **42**(1): 9-18.



240. Muhamad P, Ruengweerayut R, Chacharoenkul W, Rungsahirunrat K, Na-Bangchang K. Monitoring of clinical efficacy and in vitro sensitivity of *Plasmodium vivax* to chloroquine in area along Thai Myanmar border during 2009-2010. *Malar J* 2011; **10**: 44.
241. Van den Eede P, Soto-Calle VE, Delgado C, et al. *Plasmodium vivax* sub-patent infections after radical treatment are common in Peruvian patients: results of a 1-year prospective cohort study. *PLoS One* 2011; **6**(1): e16257.
242. Yohannes AM, Teklehaimanot A, Bergqvist Y, Ringwald P. Confirmed vivax resistance to chloroquine and effectiveness of artemether-lumefantrine for the treatment of vivax malaria in Ethiopia. *Am J Trop Med Hyg* 2011; **84**(1): 137-40.
243. Graf PC, Durand S, Alvarez Antonio C, et al. Failure of Supervised Chloroquine and Primaquine Regimen for the Treatment of *Plasmodium vivax* in the Peruvian Amazon. *Malar Res Treat* 2012; **2012**: 936067.
244. Pedro RS, Guaraldo L, Campos DP, Costa AP, Daniel-Ribeiro CT, Brasil P. *Plasmodium vivax* malaria relapses at a travel medicine centre in Rio de Janeiro, a non-endemic area in Brazil. *Malar J* 2012; **11**: 245.
245. Ganguly S, Saha P, Guha SK, et al. In vivo therapeutic efficacy of chloroquine alone or in combination with primaquine against vivax malaria in Kolkata, West Bengal, India, and polymorphism in *pvmdr1* and *pvcr1-o* genes. *Antimicrob Agents Chemother* 2013; **57**(3): 1246-51.
246. Leang R, Barrette A, Bouth DM, et al. Efficacy of dihydroartemisinin-piperaquine for treatment of uncomplicated *Plasmodium falciparum* and *Plasmodium vivax* in Cambodia, 2008 to 2010. *Antimicrob Agents Chemother* 2013; **57**(2): 818-26.
247. Liu H, Yang HL, Xu JW, Wang JZ, Nie RH, Li CF. Artemisinin-naphthoquine combination versus chloroquine-primaquine to treat vivax malaria: an open-label randomized and non-inferiority trial in Yunnan Province, China. *Malar J* 2013; **12**: 409.
248. Macareo L, Lwin KM, Cheah PY, Yuentrakul P, Miller RS, Nosten F. Triangular test design to evaluate tinidazole in the prevention of *Plasmodium vivax* relapse. *Malar J* 2013; **12**: 173.
249. Miahpour A, Keshavarz H, Heidari A, Raeisi A, Rezaeian M, Rezaei S. Assessment of the efficacy of 8 weeks of primaquine for the prevention of relapse in vivax malaria patients using SSCP-PCR and sequencing in South and South-East Iran, 2008-2011. *Trans R Soc Trop Med Hyg* 2013; **107**(7): 420-6.
250. Rios A, Alvarez G, Blair S. [Ten years of chloroquine efficacy for uncomplicated *Plasmodium vivax* malaria treatment, Turbo, Antioquia, 2002 and 2011]. *Biomedica* 2013; **33**(3): 429-38.
251. Zhu G, Lu F, Cao J, et al. Blood stage of *Plasmodium vivax* in central China is still susceptible to chloroquine plus primaquine combination therapy. *Am J Trop Med Hyg* 2013; **89**(1): 184-7.
252. Amaratunga C, Sreng S, Mao S, et al. Chloroquine remains effective for treating *Plasmodium vivax* malaria in Pursat province, Western Cambodia. *Antimicrob Agents Chemother* 2014; **58**(10): 6270-2.
253. Delgado-Ratto C, Soto-Calle VE, Van den Eede P, et al. Population structure and spatio-temporal transmission dynamics of *Plasmodium vivax* after radical cure treatment in a rural village of the Peruvian Amazon. *Malar J* 2014; **13**: 8.
254. Liu H, Yang HL, Tang LH, et al. Monitoring *Plasmodium vivax* chloroquine sensitivity along China-Myanmar border of Yunnan Province, China during 2008-2013. *Malar J* 2014; **13**: 364.
255. Rajgor DD, Gogtay NJ, Kadam VS, et al. Antirelapse Efficacy of Various Primaquine Regimens for *Plasmodium vivax*. *Malar Res Treat* 2014; **2014**: 347018.

256. Ould Ahmedou Salem MS, Mohamed Lemine YO, Deida JM, et al. Efficacy of chloroquine for the treatment of *Plasmodium vivax* in the Saharan zone in Mauritania. *Malar J* 2015; **14**: 39.
257. Assefa M, Eshetu T, Biruksew A. Therapeutic efficacy of chloroquine for the treatment of *Plasmodium vivax* malaria among outpatients at Hossana Health Care Centre, southern Ethiopia. *Malar J* 2015; **14**: 458.
258. Cheoymang A, Ruenweerayut R, Muhamad P, Rungsihirunrat K, Na-Bangchang K. Patients' adherence and clinical effectiveness of a 14-day course of primaquine when given with a 3-day chloroquine in patients with *Plasmodium vivax* at the Thai-Myanmar border. *Acta Trop* 2015; **152**: 151-6.
259. Pareek A, Chandurkar N, Gogtay N, et al. Sustained Release Formulation of Primaquine for Prevention of Relapse of *Plasmodium vivax* Malaria: A Randomized, Double-Blind, Comparative, Multicentric Study. *Malar Res Treat* 2015; **2015**: 579864.
260. Yuan L, Wang Y, Parker DM, et al. Therapeutic responses of *Plasmodium vivax* malaria to chloroquine and primaquine treatment in northeastern Myanmar. *Antimicrob Agents Chemother* 2015; **59**(2): 1230-5.
261. Beyene HB, Beyene MB, Ebstie YA, Desalegn Z. Efficacy of Chloroquine for the Treatment of Vivax malaria in Northwest Ethiopia. *PLoS One* 2016; **11**(8): e0161483.
262. Lo E, Nguyen J, Oo W, et al. Examining *Plasmodium falciparum* and *P. vivax* clearance subsequent to antimalarial drug treatment in the Myanmar-China border area based on quantitative real-time polymerase chain reaction. *BMC Infect Dis* 2016; **16**: 154.
263. Longley RJ, Sriporote P, Chobson P, et al. High Efficacy of Primaquine Treatment for *Plasmodium vivax* in Western Thailand. *Am J Trop Med Hyg* 2016; **95**(5): 1086-9.
264. Negreiros S, Farias S, Viana GM, et al. Efficacy of Chloroquine and Primaquine for the Treatment of Uncomplicated *Plasmodium vivax* Malaria in Cruzeiro do Sul, Brazil. *Am J Trop Med Hyg* 2016; **95**(5): 1061-8.
265. Waqar T, Khushdil A, Haque K. Efficacy of Chloroquine as a first line agent in the treatment of uncomplicated malaria due to *Plasmodium vivax* in children and treatment practices in Pakistan: A Pilot study. *J Pak Med Assoc* 2016; **66**(1): 30-3.
266. Seifu S, Zeynudin A, Zemene E, Suleman S, Biruksew A. Therapeutic efficacy of chloroquine for the treatment of *Plasmodium vivax* malaria among outpatients at Shawa Robit Health Care Centre, North-East Ethiopia. *Acta Trop* 2017; **171**: 44-51.
